# Supplementary material for: High incidence and geographic distribution of cleft palate in Finland are associated with the IRF6 gene
Source: PubMed Central journal article supplement — Nat Commun. 2024 Nov 6;15:9568. doi: 10.1038/s41467-024-53634-2 (PMC11538390; doi:10.1038/s41467-024-53634-2), 2024-11-06
Supplement: 41467_2024_53634_MOESM2_ESM.pdf [file 41467_2024_53634_MOESM2_ESM.pdf]

## Supplementary Information

### High incidence and geographic distribution of cleft palate in Finland are associated with the *IRF6* gene

Fedik Rahimov, Pekka Nieminen, Priyanka Kumari, Emma Juuri, Tiit Nikopensius, Kitt Paraiso, Jakob German, Antti Karvanen, Mart Kals, Abdelrahman G. Elnahas, Juha Karjalainen, Mitja Kurki, Aarno Palotie, FinnGen, Estonian Biobank Research Team, Arja Heliövaara, Tõnu Esko, Sakari Jukarainen, Priit Palta, Andrea Ganna, Anjali P. Patni, Daniel Mar, Karol Bomsztyk, Julie Mathieu, Hannele Ruohola-Baker, Axel Visel, Walid D. Fakhouri, Brian C. Schutte, Robert A. Cornell, David P. Rice

## Supplementary Figures

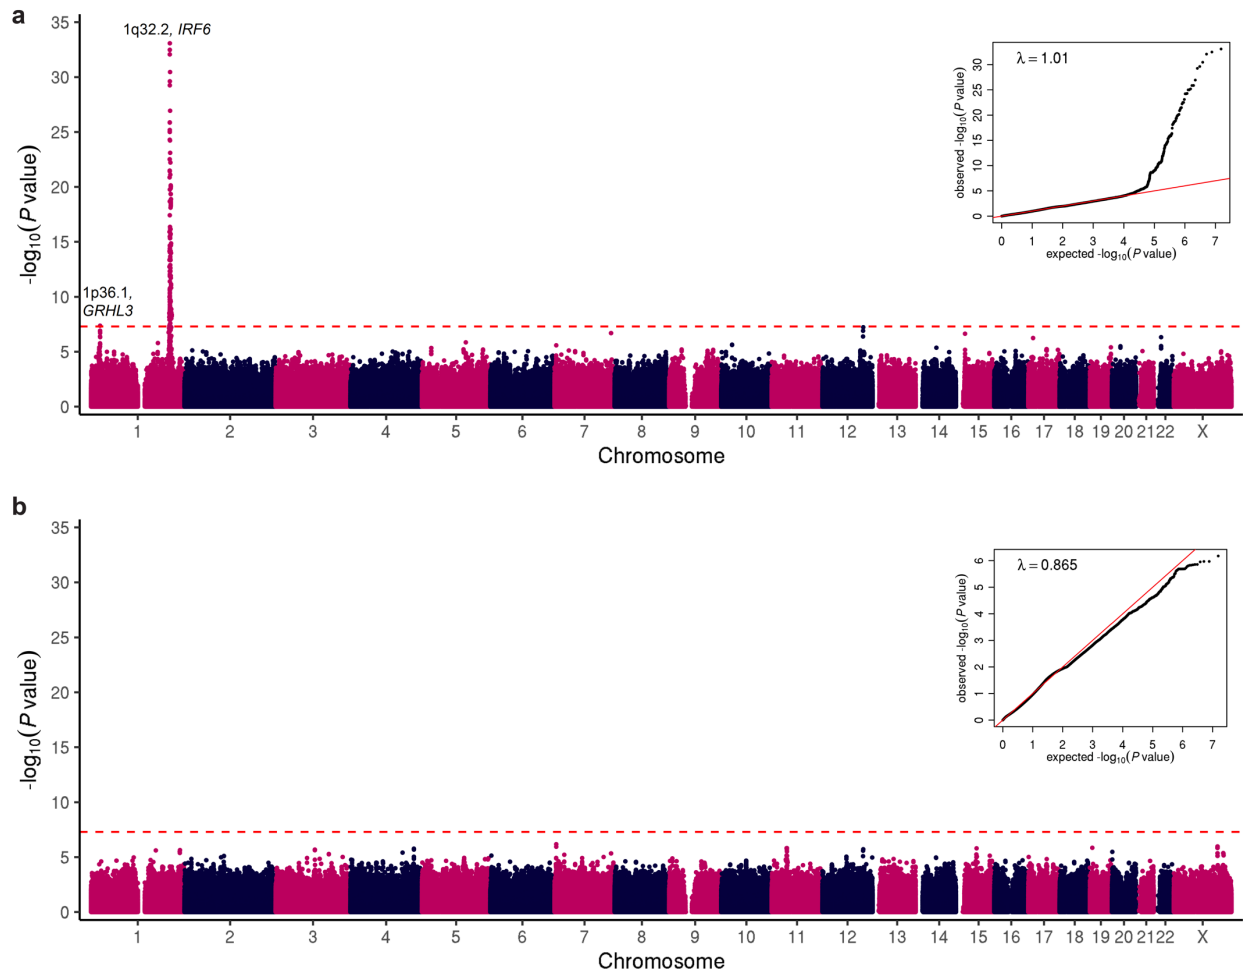

**Supplementary Fig. 1: Manhattan plots showing GWAS results of (a) 355 cases with non-syndromic OFC (CL, CLP, and CP combined) and 308,799 population controls, and (b) 151 cases with CL and CLP combined and 308,799 population controls.** Negative  $\log_{10} P$  values ( $y$  axis) are plotted for each tested variant against their chromosomal coordinates ( $x$  axis) provided in the human genome build GRCh38/hg38. Two-sided  $P$  values are obtained from a likelihood ratio test in regression analysis and are not corrected for multiple comparisons. Red dashed line represents the threshold for genome-wide statistical significance ( $P = 5 \times 10^{-8}$  or  $\log_{10}(P) = 7.3$ ) after Bonferroni correction for multiple hypothesis testing. Quantile-quantile plots are shown in inset panels, where the observed ( $y$  axis) negative  $\log_{10} P$  values are plotted against the expected ( $x$  axis) negative  $\log_{10} P$  values under null distribution (red line).

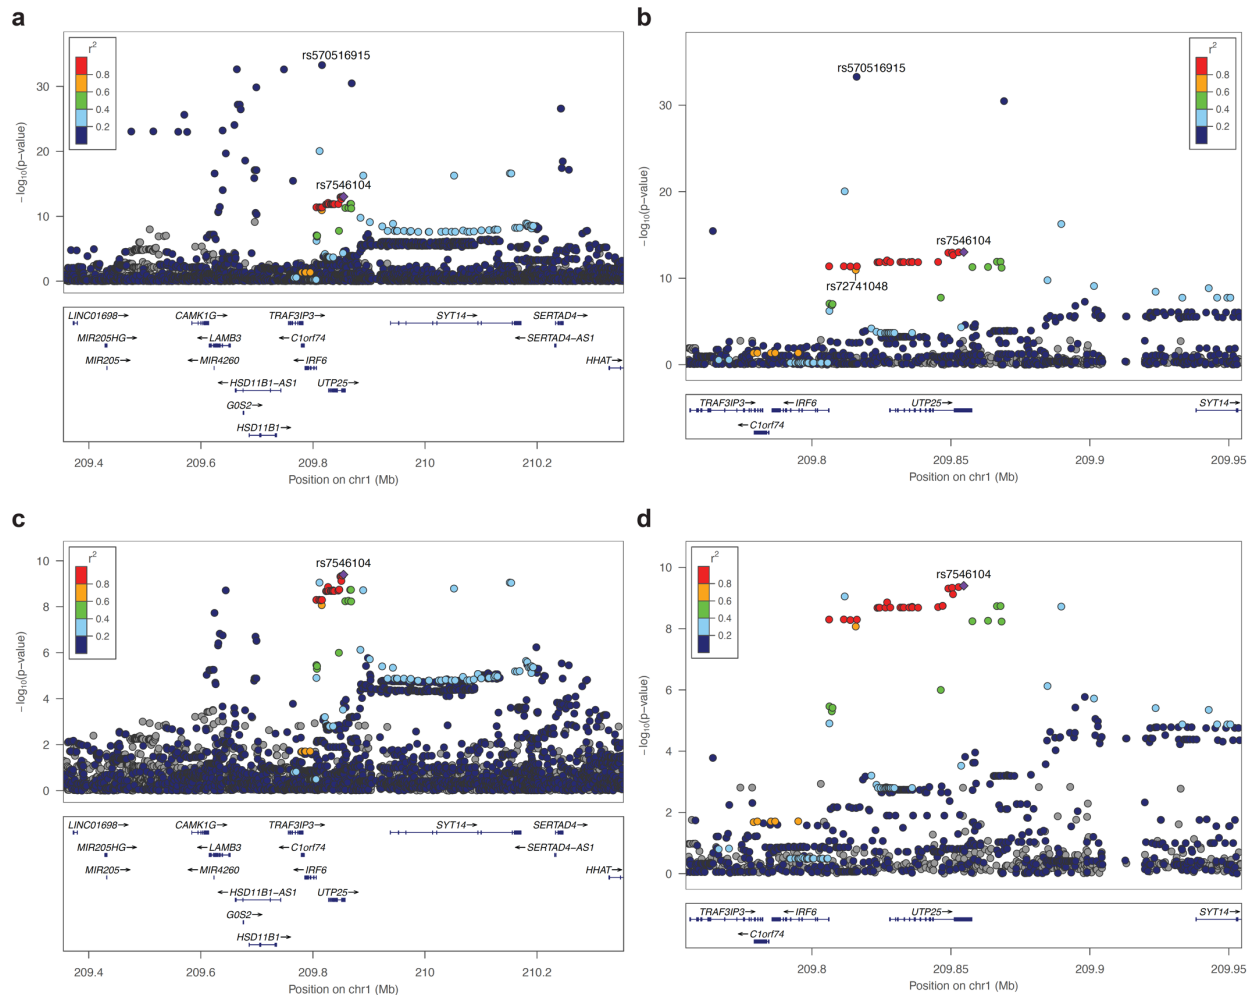

**Supplementary Fig. 2: Regional association plots of the chromosome 1q32.2 locus before (a and b) and after (c and d) conditional analysis.** For clarity, negative  $\log_{10} P$  values (y axis) are shown for variants (x axis) within a 1 Mb (a and c) and a 200 kb (b and d) windows flanking the reference SNP rs7546104, respectively. Two-sided  $P$  values are obtained from a likelihood ratio test in regression analysis and are not corrected for multiple comparisons. The reference SNP rs7546104 is labeled with a purple diamond, and pairwise LD ( $r^2$ ) between the reference SNP and other variants are indicated by color. The  $r^2$  values were estimated from high-coverage whole-genome sequences of 3,775 Finns. Both directly genotyped and imputed SNPs are plotted. Genomic coordinates are shown according to the human genome build GRCh38/hg38. Plots c and d display SNPs in LD with the lead SNP rs7546104, after adjusting for rs570516915 in a conditional analysis. Plots a and c show 1 Mb regions surrounding the index SNP, whereas plots b and d show an expanded view of a 200 kb region focusing on the independent risk haplotype tagged by rs7546104. SNP rs72741048 has been associated with OFC in a large GWAS in the Chinese population<sup>1</sup>.

**rs570516915, T > G**

|                        |               |   |               |
|------------------------|---------------|---|---------------|
| Human                  | CCTGAGAGTT    | T | CGCTCAGGCT    |
| Chimp                  | CCTGAGAGTT    | T | CGCTCAGGCT    |
| Gorilla                | CCCGAGAGTT    | T | CGCTCAGGCT    |
| Orangutan              | CCCGAGAGTT    | T | CGCTCAGGCT    |
| Gibbon                 | CCCGAGAGTT    | T | CGTTCAGGCT    |
| Rhesus                 | CCTGAGAGTT    | T | CGCTCAGGCT    |
| Crab eating macaque    | CCTGAGAGTT    | T | CGCTCAGGCT    |
| Baboon                 | CCTGAGAGTT    | T | CGCTCAGGCT    |
| Green monkey           | CCTGAGAGTT    | T | CGCTCAGGAT    |
| Marmoset               | CCTGAGAGTT    | T | CGCTCAGGCT    |
| Squirrel monkey        | CCTGAGAGTT    | T | CGCTCAGGCT    |
| Bushbaby               | CCTGAGAGTT    | T | CACTCCTGCT    |
| Chinese tree shrew     | CCTGAGAGTT    | T | CAGTCGAGCT    |
| Squirrel               | CCCAAGAGTT    | T | CACTCTGGCT    |
| Lesser Egyptian jerboa | CCC - - AAGTT | T | CGCTCTGGCT    |
| Prairie vole           | CCTGGGAGTT    | T | CGCTCTGACC    |
| Chinese hamster        | CCTGGGAGTT    | T | CGCTCTAGCC    |
| Golden hamster         | CCTGGGAGTT    | T | CGCTCTGGCC    |
| Mouse                  | CCTGGGAGTT    | T | CGCTCTGGCT    |
| Rat                    | CCTGGGAGTT    | T | CGCTCTGGCT    |
| Naked mole rat         | CCTCAGAGTT    | T | CACTCTGGCT    |
| Guinea pig             | CCTGAGAGTT    | T | CGCTCT - GCT  |
| Chinchilla             | CCTGAGAGTT    | T | CGCTCTGGCT    |
| Brush tailed rat       | CCCGAGAGTT    | T | CACTCTGGCT    |
| Rabbit                 | CCCAGGAGTT    | T | CGCTCTGGCT    |
| Pig                    | CCCGAGAGTT    | T | CG - - CTGTTT |
| Alpaca                 | CCTGGGAGTT    | T | CG - - CTGTTT |
| Bactrian camel         | CCTGGGAGTT    | T | CA - - CTGTTT |
| Dolphin                | CCCAAGAGTT    | T | CG - - CTGTTT |
| Killer whale           | CCCAAGAGTT    | T | CG - - CTGTTT |
| Tibetan antelope       | CCCGAGAGTT    | T | CG - - GAGTTT |
| Cow                    | CCCGAGAGTT    | T | CG - - GAGTTT |
| Sheep                  | CCCGAGAGTT    | T | CG - - GAGTTT |
| Domestic goat          | CCCGAGAGTT    | T | CG - - GAGTTT |
| White rhinoceros       | CCCGAGAGTT    | T | CGCTCTGGTT    |
| Cat                    | CCTGAGAGTT    | T | CGCTCTGTTT    |
| Dog                    | CCCGAGAGTT    | T | CGCTCTGTTT    |
| Ferret                 | CCTGAGAGTT    | T | CGCTCTGTTT    |
| Panda                  | CCTGAGAGTT    | T | CGCTCTGTCT    |
| Pacific walrus         | CCTGAGAGTT    | T | CGCTCTGTGT    |
| Weddell seal           | CTTGAGAGTT    | T | CGCTCTGTTT    |
| Black flying fox       | CCCGTGAGTT    | T | CGCCCTGCTT    |
| Megabat                | CCCGTGAGTT    | T | CGCCCTGCTT    |
| David's myotis         | CCCGGGAGTT    | T | CGCTCTGGTT    |
| Microbat               | CCCGGGAGTT    | T | CGCTCTGGTT    |
| Big brown bat          | CCCGGGAGTT    | T | CGCTCTGGTT    |
| Elephant               | CCCAAGAGTT    | T | CACTCTGGTT    |
| Cape elephant shrew    | CCCGAGAGTT    | T | CGCCCTGGTT    |
| Manatee                | CTCGAGAGTT    | T | CACTCTGGTT    |
| Cape golden mole       | CCCGGGAGTT    | T | CACTCTTGT     |
| Tenrec                 | CCCAGGAGTT    | T | CACTCTGGTT    |
| Aardvark               | CCCGAGAGTT    | T | CACTCTGGTT    |
| Armadillo              | CCTGAGAGTT    | T | - - CTCTCGTT  |
| Opossum                | CCC - AGAGTT  | T | CACTTGGGCT    |
| Tasmanian devil        | CCC - AGAGTT  | T | CACTTGGGCT    |
| Wallaby                | CCC - AGAGTT  | T | CACTTGGGCT    |
| Platypus               | TTCAAGAGTT    | T | C - - - - -   |

**Supplementary Fig. 3: Evolutionary conservation of the rs570516915 variant site in MCS-9.7.** Multi-species sequence alignments surrounding the rs570516915 variant site in the MCS-9.7 enhancer for *IRF6* were obtained from the multiz alignment and conservation track of 100 vertebrate species in the UCSC Genome Browser (<https://genome.ucsc.edu>).

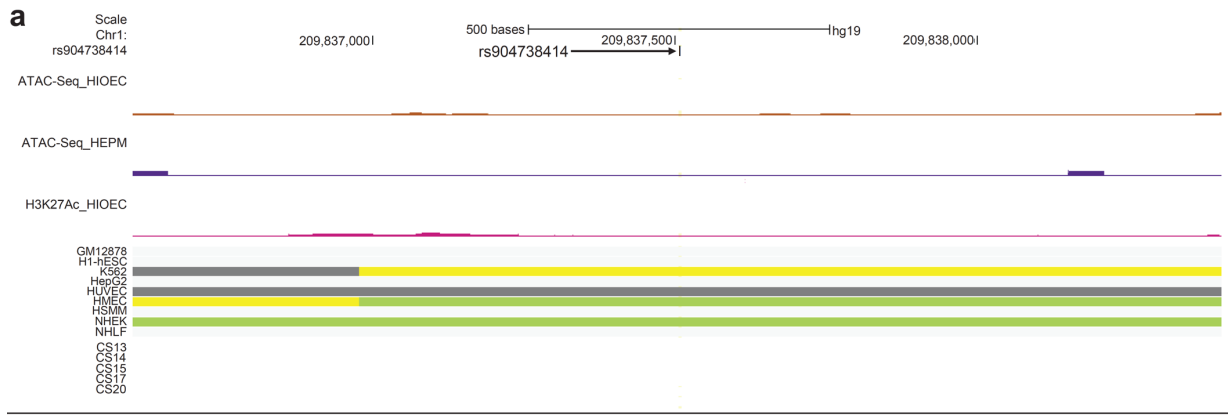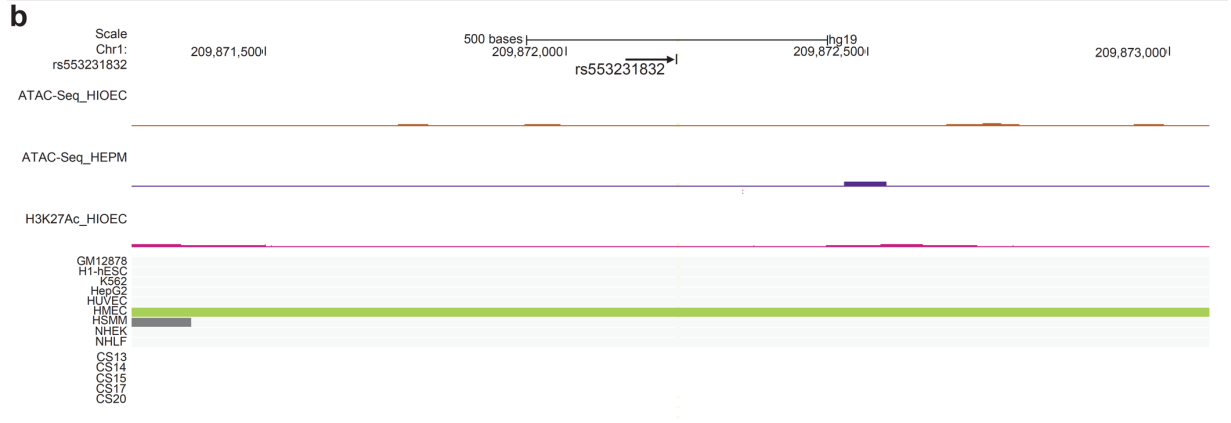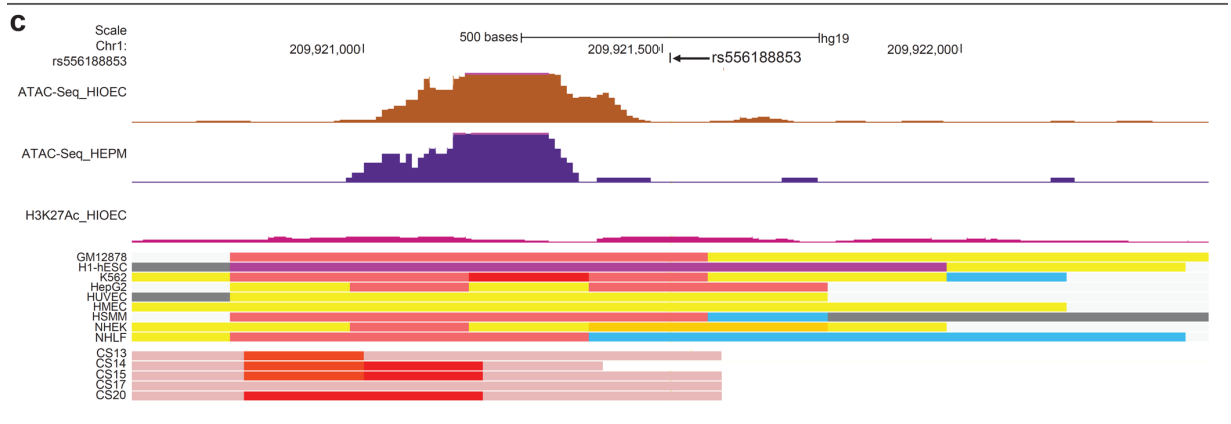

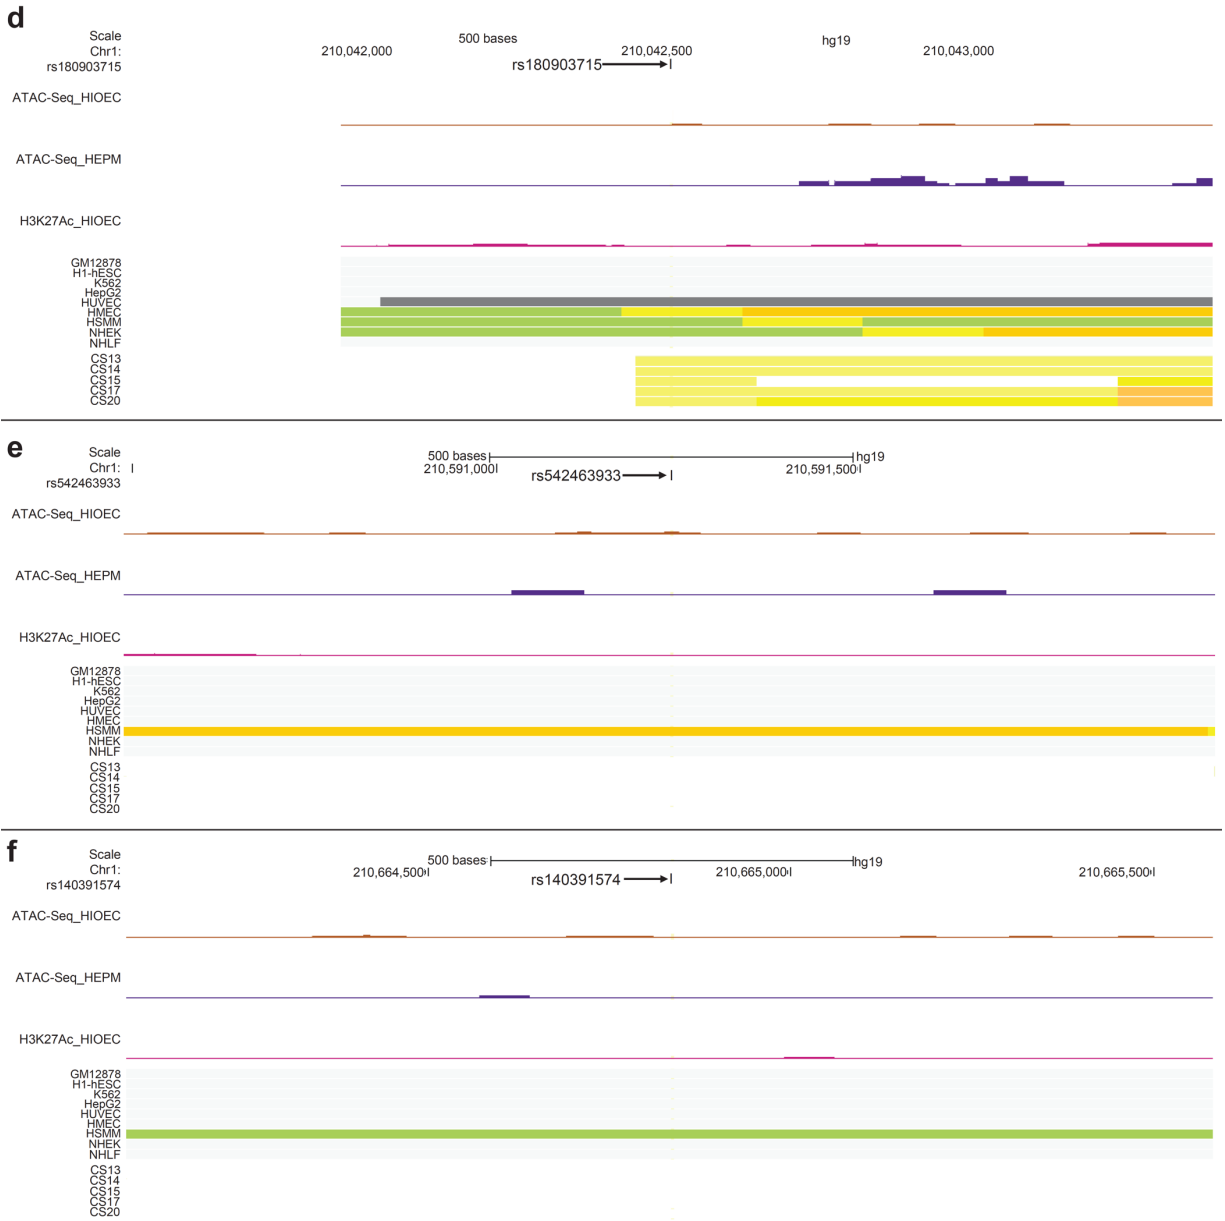

**Supplementary Fig. 4: Browser views of the human genome in GRCh37/hg19, illustrating that one (rs556188853) of the 6 SNPs in strong LD with rs570516915 falls into a region with chromatin marks consistent with enhancer activity in epithelial cells (HIOEC and NHEK).** First track, SNPs in LD with rs570516915, (a) rs904738414, (b) rs553231832, (c) rs556188853, (d) rs180903715, (e) rs542463933 and (f) rs140391574); second and third tracks, ATAC-Seq peaks from HIOEC and HEPM cells, respectively; fourth track, H3K27Ac from HIOEC cells; fifth track, chromatin status revealed by ChIP-Seq to various chromatin marks from the ENCODE Project cell lines and facial explants from human embryos at Carnegie stage (CS) 13-20, color coded as in Fig. 4a. Additional color codes from ENCODE project cell lines: bright red, active promoter; light red, weak promoter; purple, inactive/poised promoter. Additional color codes from facial explants from human embryos at CS 13-20: red, active TSS; orange red, promoter upstream or downstream TSS; light purple, poised promoter.

**a**

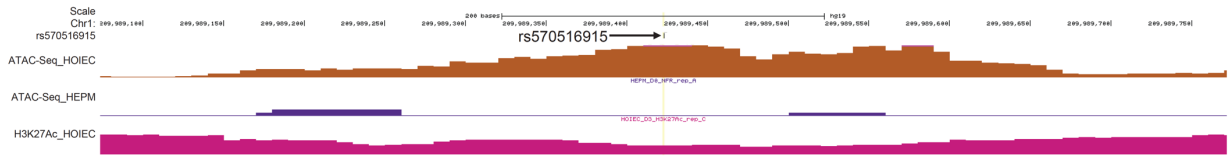

**b**

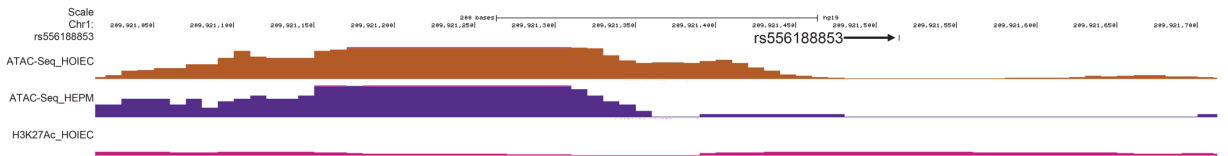

**Supplementary Fig. 5: Browser views of genomic regions included in the luciferase reporter vectors for the rs570516915 and rs556188853 variants.** First track, position of (a) rs570516915 and (b) rs556188853 SNPs; second and third track, ATAC-Seq peaks from the HIOEC and HEPM cells, respectively; fourth track, H3K27Ac peaks from the HIOEC cells.

1 S

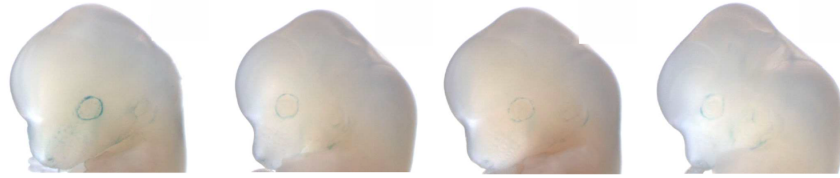

n-r

r

r

r

1 T

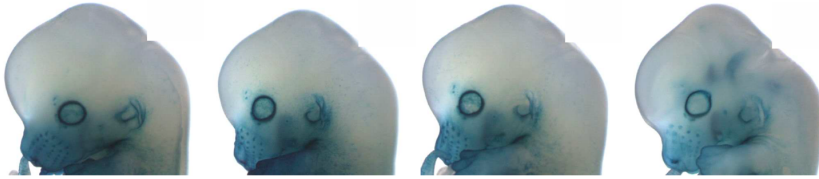

n-r

n-r

n-r

r

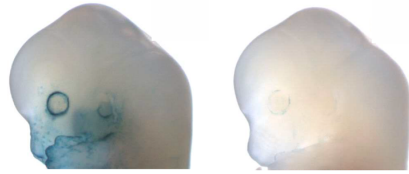

r

r

2 S

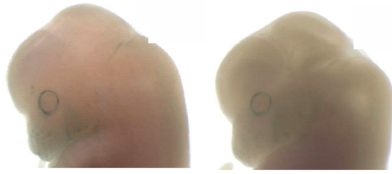

n-r

r

2 T

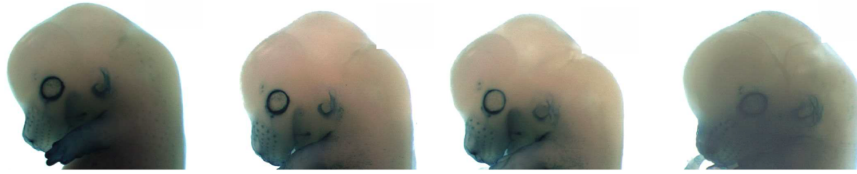

r

n-r

n-r

r

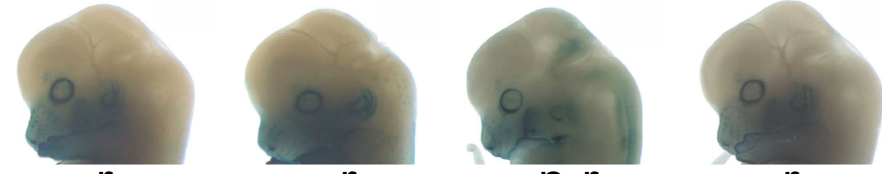

r

r

n-r

r

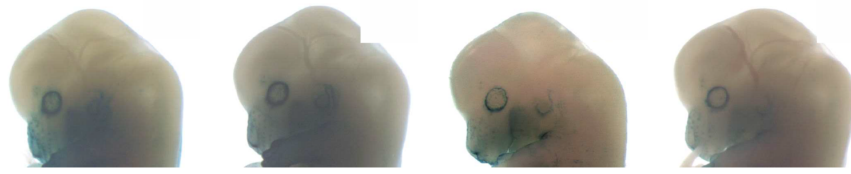

r

r

n-r

r



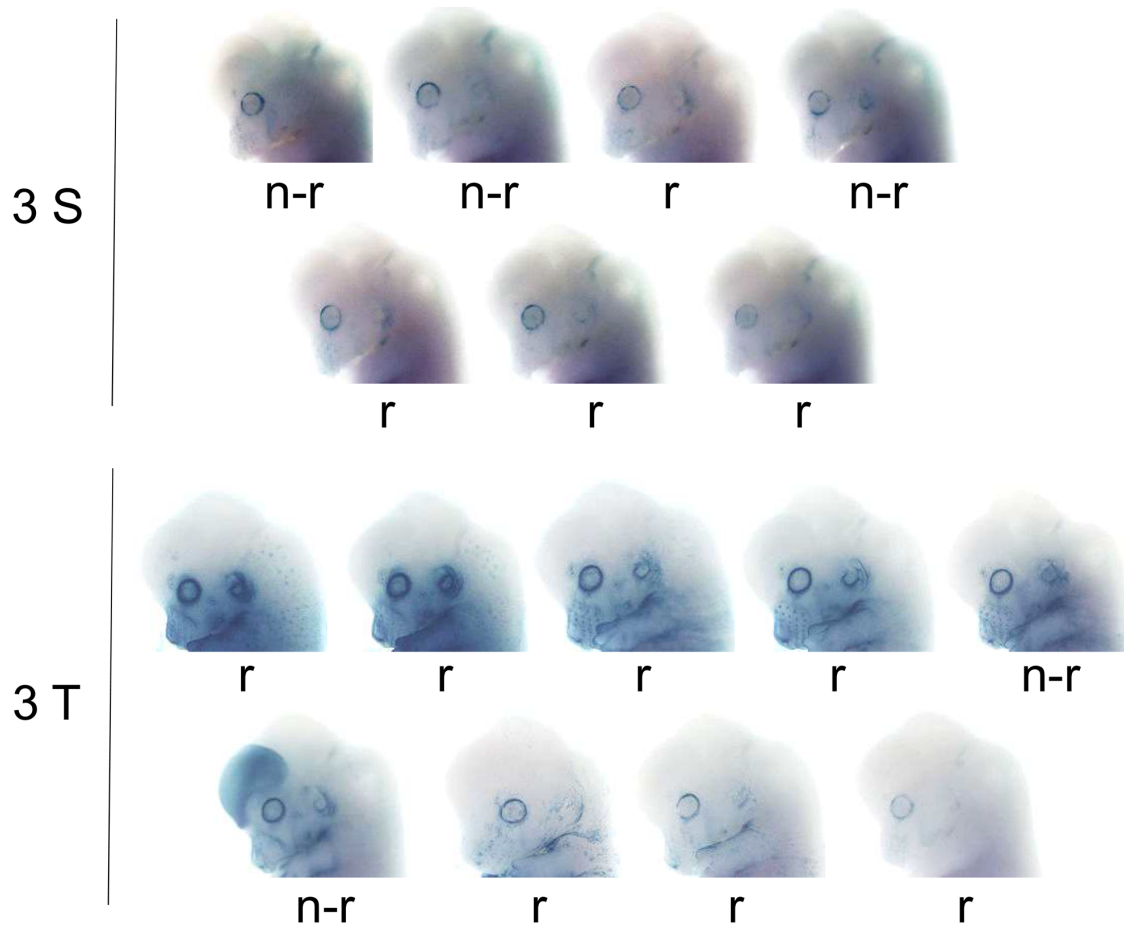

**Supplementary Fig. 6: Heads of X-gal-stained transgenic reporter embryos at E13.5 showing effect on staining of inserted non-risk and risk alleles of rs570516915.** Embryos were divided into six sets, which consisted of single (S) or tandem (T) insertions from three experimental batches (1, 2 and 3). The heads are ordered according to consensus from blinded assessments from strongest to weakest expression. Images of heads of sets 3S and 3T were adjusted similarly in each set for brightness and contrast. n-r, non-risk; r, risk.

Guide RNA and repair template sequences

**Genome with T allele**  
XXXXXXXXTGGAGCTTTGGGGCCTGGGAACCTCTCTACCTGCGTCAATGTCTGGAGCCCTGAGAGTTTCGCTCAGGCTCAGAGCAGGCATCGCAACCTCCCAGTTACTATTCTGTGCTGTGGCAAGXXXXXX

**HDR template with G allele**  
TGGAGCTTTGGGGCCTGGGAACCTCTCTACCTGCGTCAATGTCTGGAGGCCCTGAGAGTTTCGCTCAGGCTCAGAGCAGGCATCGCAACCTCCCAGTTACTATTCTGTGCTGTGGCAAG

**gRNA**  
AGCCCTGAGAGTTTCGCTCAGGCTCAGAGCAGGCATCGCAACCTCCCAGTTACTATTCTGTGCTGTGGCAAGXXXXXX

**PAM**  
TGGAGCTTTGGGGCCTGGGAACCTCTCTACCTGCGTCAATGTCTGGAGGCCCTGAGAGTTTCGCTCAGGCTCAGAGCAGGCATCGCAACCTCCCAGTTACTATTCTGTGCTGTGGCAAG

**Supplementary Fig. 7: Sequences of the guide RNA (gRNA) and homology-directed repair (HDR) template DNA used for CRISPR-Cas9 editing of the rs570516915 variant sequence. PAM represents the protospacer adjacent motif for the guide used in the study.**

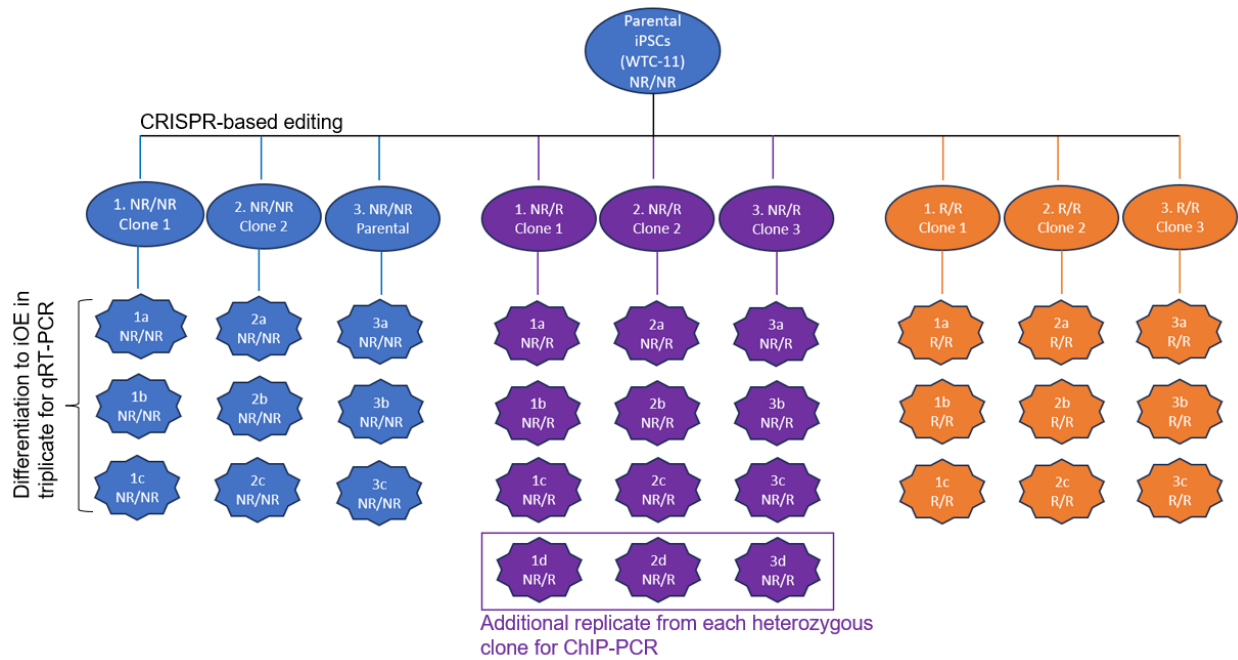

**Supplementary Fig. 8: Strategy for *in vitro* cell culture experiments:** Parental induced pluripotent stem cells (iPSCs) WTC-11, homozygous for non-risk allele of rs570516915 (TT, NR/NR), were edited to be heterozygous (TG, NR/R) or homozygous for the risk allele (GG, R/R) and subjected to a 10-day differentiation protocol to generate induced oral epithelial cells (iOECs). NR, non-risk allele; R, risk allele.

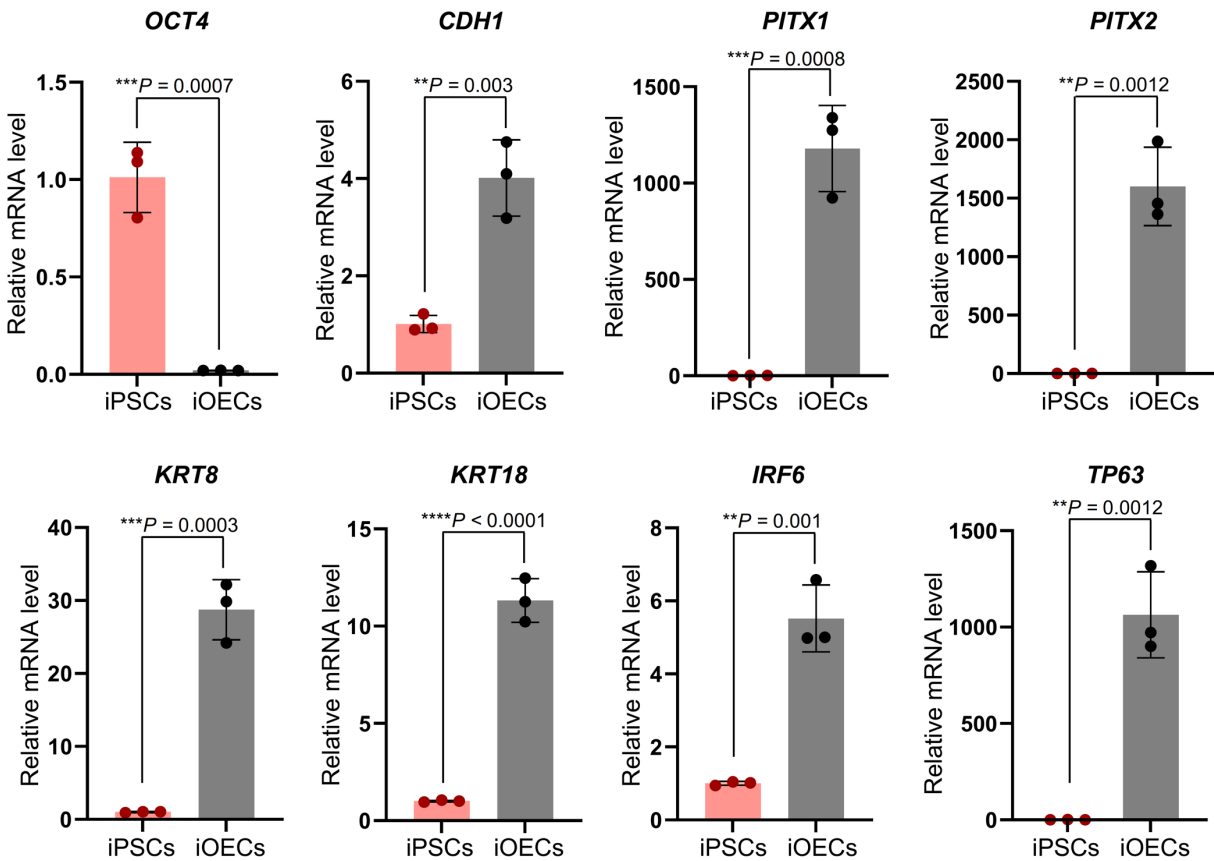

**Supplementary Fig. 9: Scattered dot plots illustrating comparison of expression of stem cell marker *OCT4* and different epithelial markers (*CDH1*, *PITX1*, *PITX2*, *KRT8*, *KRT18*, and *TP63*) in iOECs vs iPSCs by qRT-PCR. Expression levels of each gene are normalized to *ACTB* expression. Data are represented as mean values +/- s.d. from three replicates. Statistical significance is determined by Student's *t*-test (two-tailed; *P* values are indicated on the plot).**

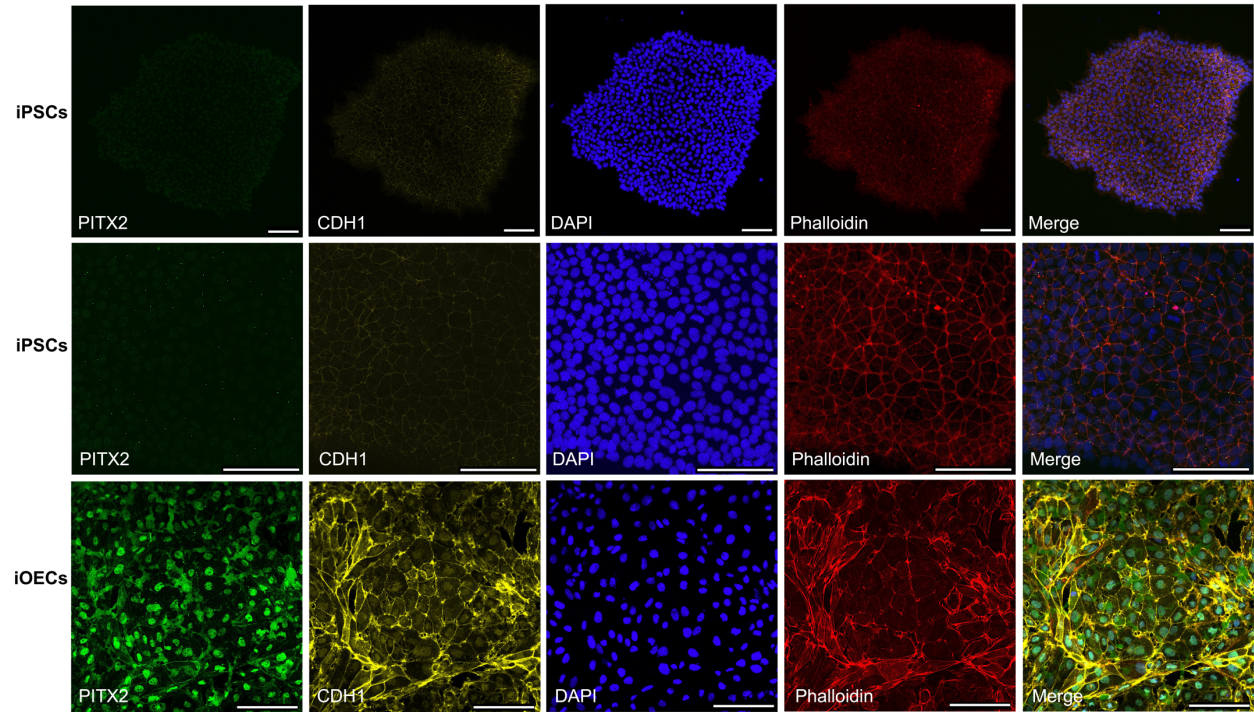

**Supplementary Fig. 10: Immunofluorescence staining of human iPSCs and iOECs.** Green, PITX2-positive nuclei; yellow, CDH1-positive induced oral epithelial cells (scale bar: 100  $\mu$ m).

| Rank | Difference log(p) for two sequences | rs570516915_A sequence p-value | rs570516915_C sequence p-value | Matrix_ID | Matrix name |
|------|-------------------------------------|--------------------------------|--------------------------------|-----------|-------------|
| 1    | 1.8                                 | 0.00382                        | 0.242                          | PB0036.1  | Irf6_1      |
| 2    | 1.49                                | 0.0117                         | 0.36                           | PB0034.1  | Irf4_1      |
| 3    | 1.3                                 | 0.0183                         | 0.363                          | PB0035.1  | Irf5_1      |
| 4    | -1.13                               | 0.354                          | 0.026                          | PF0167.1  | CCTNTMAGA   |
| 5    | 1.02                                | 0.0473                         | 0.498                          | MA0024.1  | E2F1        |
| 6    | 0.906                               | 0.111                          | 0.898                          | MA0393.1  | STE12       |
| 7    | -0.802                              | 0.533                          | 0.0842                         | MA0349.1  | OPI1        |
| 8    | 0.786                               | 0.0375                         | 0.229                          | MA0440.1  | ZAP1        |
| 9    | 0.742                               | 0.125                          | 0.69                           | PB0115.1  | Ehf_2       |
| 10   | 0.737                               | 0.156                          | 0.852                          | MA0360.1  | RDR1        |

**Supplementary Fig. 11: Prediction of IRF6 binding and the effect of the rs570516915 risk allele on its binding affinity.** Sequence shown in Supplementary Fig. 6 was searched in sTRAP<sup>2</sup> ([http://trap.molgen.mpg.de/cgi-bin/trap\\_two\\_seq\\_form.cgi](http://trap.molgen.mpg.de/cgi-bin/trap_two_seq_form.cgi)) with the non-risk (rs570516915\_A) and risk (rs570516915\_C) alleles of rs570516915 (AGCCTGAGCG[A/C]AACTCTCAGG). Complementary nucleotides are shown. *P* values are calculated by comparing the observed transcription factor (TF) affinity to the background, using a generalized extreme value (GEV) parametrization model as described previously<sup>3</sup>. *P* values are not corrected for multiple testing. As a visual aid, *P* values less than 0.05 are highlighted in green. TF matrix was selected from Jaspar (all\_matrices) and human\_promoters was selected as a background model.

ChIP-PCR from heterozygous induced oral epithelium cells

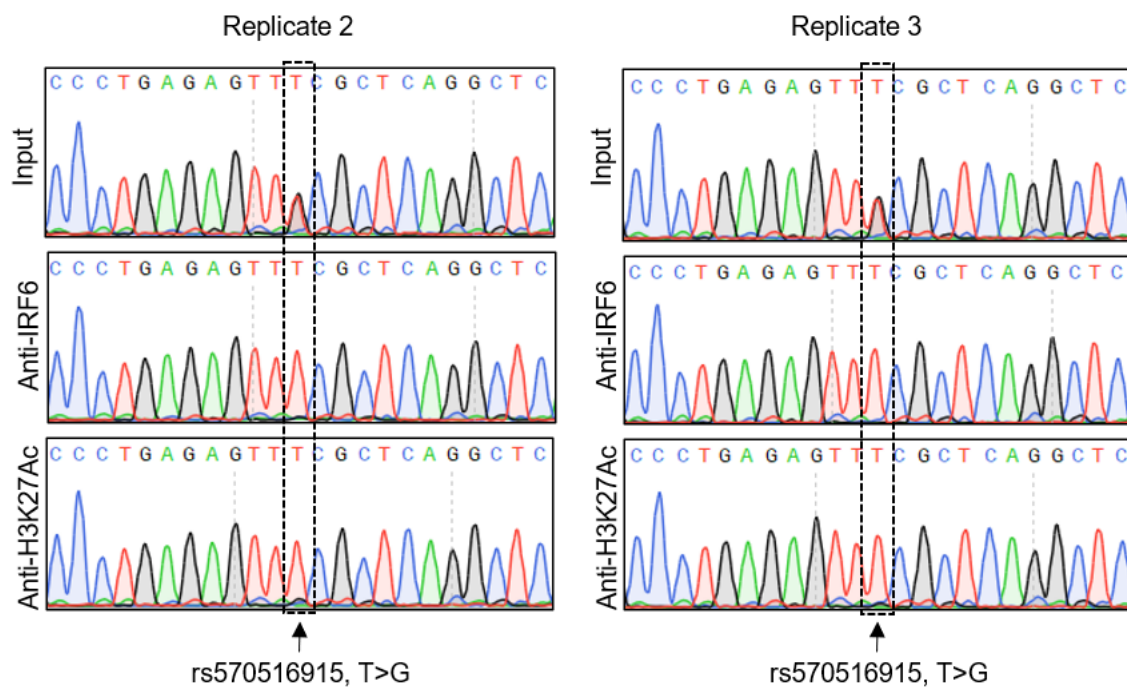

**Supplementary Fig. 12:** Sanger sequencing chromatograms of anti-IRF6 and anti-H3K27Ac ChIP-PCR products of cells heterozygous for rs570516915 from two ChIP replicates.

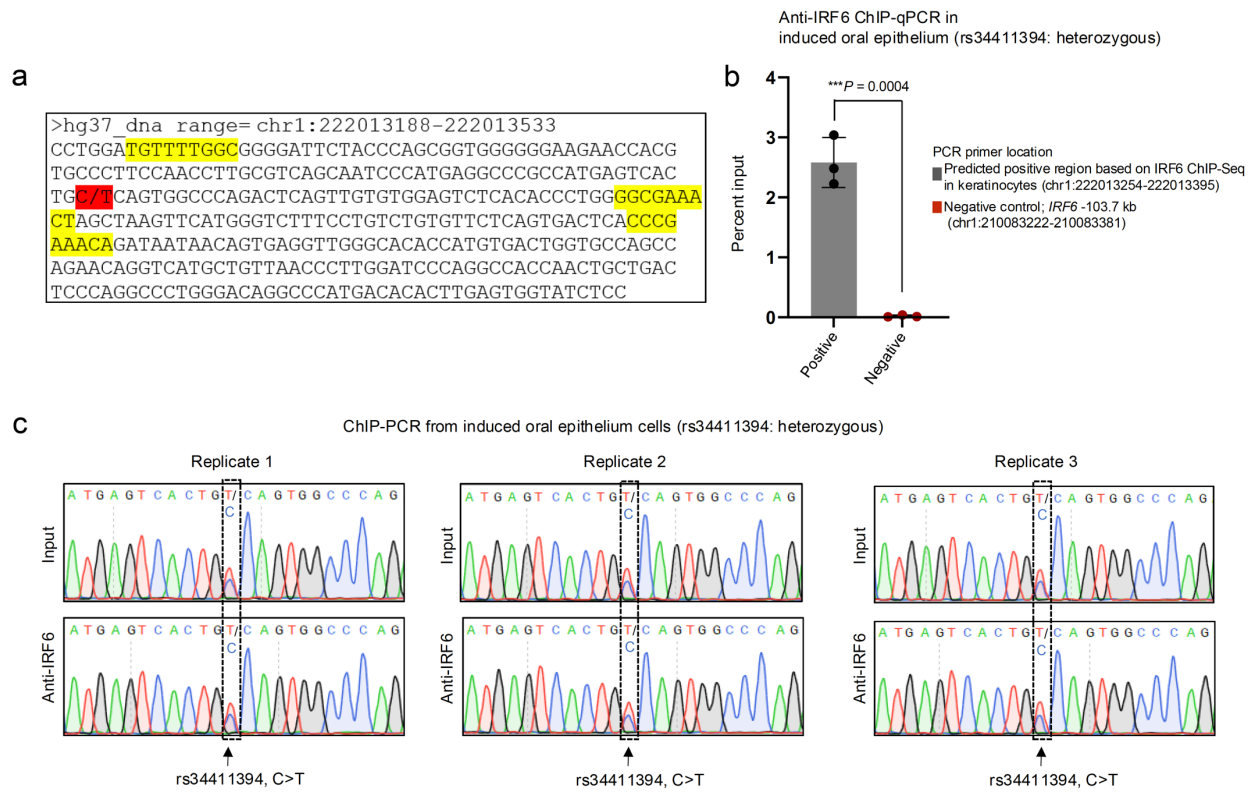

**Supplementary Fig. 13: No allele bias was detected in chromatin precipitated by anti-IRF6 at a heterozygous SNP that does not lie within a predicted IRF6 binding site.** **a** Genomic sequence underlying an anti-IRF6 ChIP-Seq peak in human keratinocytes<sup>4</sup>. IRF6 binding sites predicted by the JASPAR 2024 database<sup>5</sup> are highlighted in yellow; red, rs34411394 C>T position. **b** Percent of input chromatin precipitated by anti-IRF6 in iOECs heterozygous for rs34411394 using primers within the locus mentioned above or at a predicted negative region. The latter is located 103.7 kb upstream *IRF6* transcription start site. This region does not overlap ATAC-Seq or H3K27Ac ChIP-Seq peaks in HIOEC or NHEK cells and is devoid of predicted IRF6 binding sites. Error bars refer to 3 ChIP replicates and expressed as mean values +/- s.d. Statistical significance is determined by Student's t-test.  $P$  value (two-tailed) is indicated on the plot. **c** Sanger sequencing chromatograms of anti-IRF6 ChIP-PCR product of cells heterozygous for rs34411394.



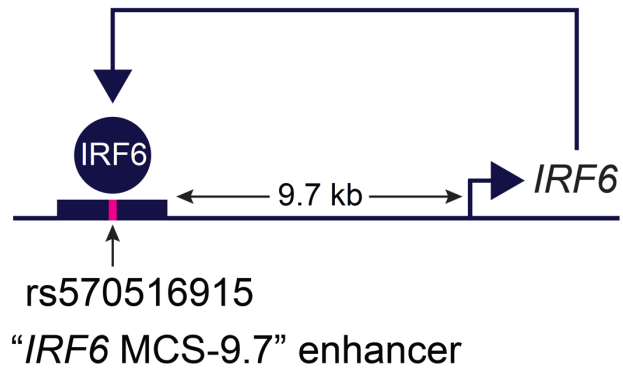

**Supplementary Fig. 14:** A schematic model depicting autoregulation of *IRF6* through the MCS-9.7 enhancer located 9.7 kb upstream of *IRF6* transcription start site.

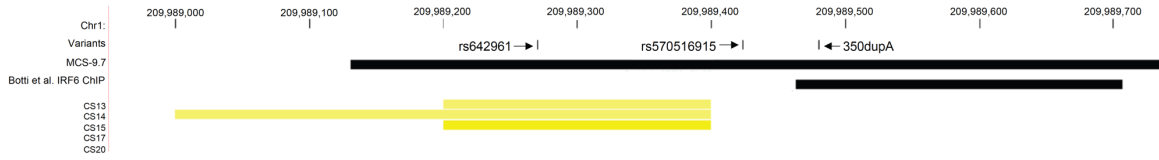

**Supplementary Fig. 15: Browser view of the human genome in GRCh37/hg19, illustrating that rs570516915 is close to IRF6 ChIP-Seq peak identified by Botti et al.** First track, three DNA variants in MCS-9.7, rs642961<sup>6</sup>, rs570516915 and 350dupA<sup>7</sup>; second and third tracks, MCS-9.7<sup>6</sup> and IRF6 binding peaks identified by Botti et al.<sup>4</sup>; fourth track, chromatin status from facial explants from human embryos at Carnegie stage (CS) 13-20, encompassing the time when palate shelves fuse where yellow bars represent the active enhancer elements.

## Supplementary Methods

**Sequence of the rs556188853 variant region inserted into the luciferase reporter construct. Variant sequence is highlighted in red.**

```
> hg19_chr1:209921014-209921714
CAGGGGCTCCCTCACACCGTCCCTTGAACAGTACCGTGGACCACAAAAGAGCAAGGCTGTCCTAAGGAAAGACTTTGC
CTCTTCGCCGGCCTCCCTTTGGGCCGTGAGGGTGGCAGCGCCACCCCGTGGCTGAATGTGGTGGTGTACCACGCTTC
ACGCAATCTCCTTGCCAGTGCATCAGGTTCTACCCAGGGCGGCCACCACCTGCACACCAGCGTGCCTACCAGT
GAGTCATCGCTTAGGGCCCTGAACAGTACCTAGAGGCGGGGCTGGACTCCGGCGTCCGGTAACTCCGCCCCGGCTGCTG
GGGCTACGTTTGGCATTGAGCCGTGGGAACTAGACCTGTTCAATAGCGACAGCTAGTGGTACCCTCAAAAACAA
GGTGCTCTGAACCTCGCGGGGAAAGCGCTGCAAGATATGGGAAAATCAGGACAGATGATTGGCCTTGAGTGGAAGC
TGGCACATTTTCGAAGCCACTCTTGGGTAATAATGGTCTG/AATCGAAAACCCAAACGCTTTAAAGTGATGTACAACGA
CCTTGGCTGCCTCTCCAGCCACATCTCGGGCCACCTGCCTTGGCTTTTATTCCCAAGGACAAAGAAGTCCAGTCC
TCTGAAGCACCTGATGATCCCCTGTGTGTTGGCCATGCCATCTCCTCTGCCCTGAGCGCTCTTCACTCTCCCAT
TGCATGGTTA
```

**Sequence of the rs570516915 variant region inserted into the luciferase reporter construct. Variant sequence is highlighted in red.**

```
> hg19_chr1:209989073-209989773
GTTTCATCAGGGGATTTTTTAAAAATTTAGTTTTTAAAGAGTTTTATCCAAGGTCTCAAAGCTGGTAAATGGTGAGTAG
GAAGTTGATTCTGCCCGATCTGTCTGACTCCATGCCCTTTCTATTAGGTCATGAAGGGGAACCTGAGGATTGGAGCT
TTGGAATGTTAATCTTACCCAAAGGCCTGAAGTAATACCCAGAATGTGAACATGTGTGACCATCTGCCTGTCTGG
GGGTGGGAAGAAGGCAGCATGCTCTATCCTTGACCCTGATTGAGCCAGGGGCTGAATCTGGAGCTTTGGGGCCTGG
GAACCTCTCTACCTGCGTCAATGTCTGGAGGCCCTGAGAGTT/GCGCTCAGGCTCAGAGCAGGCATCGCAACCTCC
CAGTTACTATTCTGTGCTGTGGCAAGTGCCAGCTTGTCTCTCTTCCCCACCCAGCCCCGGGAAACCGGCAGCATTTC
TAGTTCAGGCCCAGACCCGTCCTGGCAGCCTGGATTCCACTGCCTAGGCAGGAAGCTCATCTCAGCCCAGTGACCTT
TTCTCTCTGTTTTTTGTACAGAGGAATTTCCATGCCAGCAGTATGGGGCAATGGGGTGGGTGGCCAAAGGTTTCC
CCCTTAAGCCACAAGAGCCATGGAGTGGAGGTAAGCTAAGCAAACAGAGGAGGAAGGATGGGAGGGAAGGATCAGGA
AGATTTAGAG
```

**Sequence of the rs570516915 variant region on the Finnish haplotype background fused to the *LacZ* reporter gene for transgenic F0 embryo assay. Variant sequence is highlighted in red.**

```
> hg19_chr1:209988937-209990041
CTAAGAGTAATTTACCTATGTTAGCTTTTCTGGAATTGTTCCAGAATCTTGCCTTTGAAGGAAAAGTTGTGGCTGC
GTATTCTGCCCTCTCTGTTTGGAAATCCCCTGCACAGCTTTGCCAGCTACTCAGCTTGGTTCATCAGGGGATTTTT
TTAAAATTTAGTTTTTAAAGAGTTTTATCCAAGGTCTCAAAGCTGGTAAATGGTGAGTAGGAAGTTGATTCTGCCCGA
TCTGTCTGACTCCATGCCCTTTCTATTAGGTCATGAAGGGGAACCTGAGGATTGGAGCTTTGGAATGTTAATCTTAC
CCAAAGGCCTGAAGTAATACCCAGGATGTGAACATGTGTGACCATCTGCCTGTCTGGGGTGGGAAGAAGGCAGC
ATGCTCTATCCTTGACCCTGATTGAGCCAGGGGCTGAATCTGGAGCTTTGGGGCCTGGGAACCTCTCTACCTGCGT
CAATGTCTGGAGGCCCTGAGAGTT/GCGCTCAGGCTCAGAGCAGGCATCGCAACCTCCCAGTTACTATTCTGTGCT
GTGGCAAGTGCCAGCTTGTCTCTCTTCCCCACCCAGCCCCGGGAAACCAGCAGCATTCTAGTTCAGGCCCAGACCC
GTCCTGGCAGCCTGGATTCCACTGCCTAGGCAGGAAGCTCATCTCAGCCCAGTGACCTTTTCTCTCTGTTTTTTGTG
ACAGAGGAATTTCCATGCCAGCAGTATGGGGCAATGGGGTGGGTGGCCAAAGGTTTCCCCCTTAAGCCACAAGAGC
CATGGAGTGGAGGTAAGCTAAGCAAACAGAGGAGGAAGGATGGGAGGGAAGGATCAGGAAGATTTAGAGAGTCCATT
CCTCAGGCTGCTTCATCCTCAAATTTCAAAGGTAATAAAGGTGTTGGGAAGGATGCACTATATGTCCAGCTGCCAG
CCCTGAAGATCCTCCCCCTAGAGAAGTGGAGACAGGAGTTTTCTCACATTCCCACATGCAGGAGGGAAAGAGGCTGGG
CCTGGGCAGGTCTAGAGAGTTCTGTTCCCTTGCCCCAGGGGAACACGCCTAGGCTTGCTGACCTCTCAGGTAGGAGT
CTGTGAGGTTGGAAGCTGGGCCTCTCATT
```

## Supplementary References

1. Huang, L. et al. Genetic factors define CPO and CLO subtypes of nonsyndromic orofacial cleft. *PLoS Genet.* **15**, e1008357 (2019).
2. Thomas-Chollier, M. et al. Transcription factor binding predictions using TRAP for the analysis of ChIP-seq data and regulatory SNPs. *Nat. Protoc.* **6**, 1860-1869 (2011).
3. Manke, T., Roider, H.G. & Vingron, M. Statistical modeling of transcription factor binding affinities predicts regulatory interactions. *PLoS Comput. Biol.* **4**, e1000039 (2008).
4. Botti, E. et al. Developmental factor IRF6 exhibits tumor suppressor activity in squamous cell carcinomas. *Proc. Natl. Acad. Sci. U. S. A.* **108**, 13710-13715 (2011).
5. Rauluseviciute, I. et al. JASPAR 2024: 20th anniversary of the open-access database of transcription factor binding profiles. *Nucleic Acids Res.* **52**, D174-D182 (2024).
6. Rahimov, F. et al. Disruption of an AP-2alpha binding site in an IRF6 enhancer is associated with cleft lip. *Nat. Genet.* **40**, 1341-1347 (2008).
7. Fakhouri, W.D. et al. An etiologic regulatory mutation in IRF6 with loss- and gain-of-function effects. *Hum. Mol. Genet.* **23**, 2711-2720 (2014).

## FinnGen

| Full Name           | Affiliation                                                                                                                                                            | E-mail                                | Role 1             | Role 2                            |
|---------------------|------------------------------------------------------------------------------------------------------------------------------------------------------------------------|---------------------------------------|--------------------|-----------------------------------|
| Aarno Palotie       | Institute for Molecular Medicine Finland (FIMM), HiLIFE, University of Helsinki, Helsinki, Finland; Broad Institute of MIT and Harvard; Massachusetts General Hospital | aarno.palotie@helsinki.fi             | Steering Committee | Steering Committee                |
| Mark Daly           | Institute for Molecular Medicine Finland (FIMM), HiLIFE, University of Helsinki, Helsinki, Finland; Broad Institute of MIT and Harvard; Massachusetts General Hospital | mark.daly@helsinki.fi                 | Steering Committee | Steering Committee                |
| Bridget Riley-Gills | Abbvie, Chicago, IL, United States                                                                                                                                     | bridget.rileygills@abbvie.com         | Steering Committee | Pharmaceutical companies          |
| Howard Jacob        | Abbvie, Chicago, IL, United States                                                                                                                                     | howard.jacob@abbvie.com               | Steering Committee | Pharmaceutical companies          |
| Coralie Violette    | Astra Zeneca, Cambridge, United Kingdom                                                                                                                                | coralie.violet@astrazeneca.com        | Steering Committee | Pharmaceutical companies          |
| Slavé Petrovski     | Astra Zeneca, Cambridge, United Kingdom                                                                                                                                | slav.petrovski@astrazeneca.com        | Steering Committee | Pharmaceutical companies          |
| Chia-Yen Chen       | Biogen, Cambridge, MA, United States                                                                                                                                   | chiayen.chen@biogen.com               | Steering Committee | Pharmaceutical companies          |
| Sally John          | Biogen, Cambridge, MA, United States                                                                                                                                   | sally.john@biogen.com                 | Steering Committee | Pharmaceutical companies          |
| George Okafo        | Boehringer Ingelheim, Ingelheim am Rhein, Germany                                                                                                                      | george.okafo@boehringer-ingelheim.com | Steering Committee | Pharmaceutical companies          |
| Robert Plenge       | Bristol Myers Squibb, New York, NY, United States                                                                                                                      | robert.plenge@bms.com                 | Steering Committee | Pharmaceutical companies          |
| Joseph Maranville   | Bristol Myers Squibb, New York, NY, United States                                                                                                                      | joseph.maranville@bms.com             | Steering Committee | Pharmaceutical companies          |
| Mark McCarthy       | Genentech, San Francisco, CA, United States                                                                                                                            | mccarthy.mark@gene.com                | Steering Committee | Pharmaceutical companies          |
| Rion Pendergrass    | Genentech, San Francisco, CA, United States                                                                                                                            | penders2@gene.com                     | Steering Committee | Pharmaceutical companies          |
| Jonathan Davitte    | GlaxoSmithKline, Collegeville, PA, United States                                                                                                                       | jonathan.m.davitte@gsk.com            | Steering Committee | Pharmaceutical companies          |
| Kirsi Auro          | GlaxoSmithKline, Espoo, Finland                                                                                                                                        | kirsi.m.auro@gsk.com                  | Steering Committee | Pharmaceutical companies          |
| Simonne Longerich   | Merck, Kenilworth, NJ, United States                                                                                                                                   | simonne.longerich@merck.com           | Steering Committee | Pharmaceutical companies          |
| Anders Mälarstig    | Pfizer, New York, NY, United States                                                                                                                                    | anders.malarstig@pfizer.com           | Steering Committee | Pharmaceutical companies          |
| Anna Vlahiotis      | Pfizer, New York, NY, United States                                                                                                                                    | anna.vlahiotis@pfizer.com             | Steering Committee | Pharmaceutical companies          |
| Katherine Klinger   | Translational Sciences, Sanofi R&D, Framingham, MA, USA                                                                                                                | katherine.klinger@sanofi.com          | Steering Committee | Pharmaceutical companies          |
| Clement Chatelain   | Translational Sciences, Sanofi R&D, Framingham, MA, USA                                                                                                                | clement.chatelain@sanofi.com          | Steering Committee | Pharmaceutical companies          |
| Matthias Gossel     | Translational Sciences, Sanofi R&D, Framingham, MA, USA                                                                                                                | matthias.gossel@sanofi.com            | Steering Committee | Pharmaceutical companies          |
| Karol Estrada       | Maze Therapeutics, San Francisco, CA, United States                                                                                                                    | kestrada@mazetx.com                   | Steering Committee | Pharmaceutical companies          |
| Robert Graham       | Maze Therapeutics, San Francisco, CA, United States                                                                                                                    | rgraham@mazetx.com                    | Steering Committee | Pharmaceutical companies          |
| Dawn Waterworth     | Janssen Research & Development, LLC, Spring House, PA, United States                                                                                                   | dwaterwo@its.jnj.com                  | Steering Committee | Pharmaceutical companies          |
| Chris O'Donnell     | Novartis Institutes for BioMedical Research, Cambridge, MA, United States                                                                                              | chris.odonnell@novartis.com           | Steering Committee | Pharmaceutical companies          |
| Nicole Renaud       | Novartis Institutes for BioMedical Research, Cambridge, MA, United States                                                                                              | nicole.renaud@novartis.com            | Steering Committee | Pharmaceutical companies          |
| Tomi P. Mäkelä      | HiLIFE, University of Helsinki, Finland, Finland                                                                                                                       | tomi.makela@helsinki.fi               | Steering Committee | University of Helsinki & Biobanks |

|                      |                                                                                                                 |                                           |                      |                                   |
|----------------------|-----------------------------------------------------------------------------------------------------------------|-------------------------------------------|----------------------|-----------------------------------|
| Jaakko Kaprio        | Institute for Molecular Medicine Finland (FIMM), HiLIFE, University of Helsinki, Helsinki, Finland              | jaakko.kaprio@helsinki.fi                 | Steering Committee   | University of Helsinki & Biobanks |
| Minna Ruddock        | Arctic biobank / University of Oulu                                                                             | minna.ruddock@oulu.fi                     | Steering Committee   | University of Helsinki & Biobanks |
| Petri Virolainen     | Auria Biobank / University of Turku / Hospital District of Southwest Finland, Turku, Finland                    | petri.virolainen@tyks.fi                  | Steering Committee   | University of Helsinki & Biobanks |
| Antti Hakanen        | Auria Biobank / University of Turku / Hospital District of Southwest Finland, Turku, Finland                    | antti.hakanen@tyks.fi                     | Steering Committee   | University of Helsinki & Biobanks |
| Terhi Kilpi          | THL Biobank / Finnish Institute for Health and Welfare (THL), Helsinki, Finland                                 | terhi.kilpi@thl.fi                        | Steering Committee   | University of Helsinki & Biobanks |
| Markus Perola        | THL Biobank / Finnish Institute for Health and Welfare (THL), Helsinki, Finland                                 | markus.perola@thl.fi                      | Steering Committee   | University of Helsinki & Biobanks |
| Jukka Partanen       | Finnish Red Cross Blood Service / Finnish Hematology Registry and Clinical Biobank, Helsinki, Finland           | jukka.partanen@veripalvelu.fi             | Steering Committee   | University of Helsinki & Biobanks |
| Taneli Raivio        | Helsinki Biobank / Helsinki University and Hospital District of Helsinki and Uusimaa, Helsinki                  | taneli.raivio@hus.fi                      | Steering Committee   | University of Helsinki & Biobanks |
| Jani Tikkanen        | Northern Finland Biobank Borealis / University of Oulu / Northern Ostrobothnia Hospital District, Oulu, Finland | jani.tikkanen@ppshp.fi                    | Steering Committee   | University of Helsinki & Biobanks |
| Raisa Serpi          | Northern Finland Biobank Borealis / University of Oulu / Northern Ostrobothnia Hospital District, Oulu, Finland | raisa.serpi@ppshp.fi                      | Steering Committee   | University of Helsinki & Biobanks |
| Kati Kristiansson    | Finnish Clinical Biobank Tampere / University of Tampere / Pirkanmaa Hospital District, Tampere, Finland        | kati.kristiansson@pirha.fi                | Steering Committee   | University of Helsinki & Biobanks |
| Veli-Matti Kosma     | Biobank of Eastern Finland / University of Eastern Finland / Northern Savo Hospital District, Kuopio, Finland   | veli-matti.kosma@uef.fi                   | Steering Committee   | University of Helsinki & Biobanks |
| Jari Laukkanen       | Central Finland Biobank / University of Jyväskylä / Central Finland Health Care District, Jyväskylä, Finland    | jari.laukkanen@ksshp.fi                   | Steering Committee   | University of Helsinki & Biobanks |
| Marco Hautalahti     | FINBB - Finnish biobank cooperative                                                                             | marco.hautalahti@finbb.fi                 | Steering Committee   | University of Helsinki & Biobanks |
| Outi Tuovila         | Business Finland, Helsinki, Finland                                                                             | outi.tuovila@businessfinland.fi           | Steering Committee   | Other Experts/ Non-Voting Members |
| Jeffrey Waring       | Abbvie, Chicago, IL, United States                                                                              | jeff.waring@abbvie.com                    | Scientific Committee | Pharmaceutical companies          |
| Bridget Riley-Gillis | Abbvie, Chicago, IL, United States                                                                              | bridget.rileygillis@abbvie.com            | Scientific Committee | Pharmaceutical companies          |
| Fedik Rahimov        | Abbvie, Chicago, IL, United States                                                                              | fedik.rahimov@abbvie.com                  | Scientific Committee | Pharmaceutical companies          |
| Ioanna Tachmazidou   | Astra Zeneca, Cambridge, United Kingdom                                                                         | ioanna.tachmazidou@astrazeneca.com        | Scientific Committee | Pharmaceutical companies          |
| Chia-Yen Chen        | Biogen, Cambridge, MA, United States                                                                            | chiayen.chen@biogen.com                   | Scientific Committee | Pharmaceutical companies          |
| Zhihao Ding          | Boehringer Ingelheim, Ingelheim am Rhein, Germany                                                               | zhihao.ding@boehringer-ingelheim.com      | Scientific Committee | Pharmaceutical companies          |
| Marc Jung            | Boehringer Ingelheim, Ingelheim am Rhein, Germany                                                               | marc_oliver.jung@boehringer-ingelheim.com | Scientific Committee | Pharmaceutical companies          |
| Hanati Tuoken        | Boehringer Ingelheim, Ingelheim am Rhein, Germany                                                               | hanati.tuoken@boehringer-ingelheim.com    | Scientific Committee | Pharmaceutical companies          |
| Shameek Biswas       | Bristol Myers Squibb, New York, NY, United States                                                               | Shameek.Biswas@bms.com                    | Scientific Committee | Pharmaceutical companies          |
| Rion Pendergrass     | Genentech, San Francisco, CA, United States                                                                     | penders2@gene.com                         | Scientific Committee | Pharmaceutical companies          |

|                         |                                                                                                                 |                                   |                      |                                   |
|-------------------------|-----------------------------------------------------------------------------------------------------------------|-----------------------------------|----------------------|-----------------------------------|
| Jonathan Davitte        | GlaxoSmithKline, Collegeville, PA, United States                                                                | jonathan.m.davitte@gsk.com        | Scientific Committee | Pharmaceutical companies          |
| Neha Raghavan           | Merck, Kenilworth, NJ, United States                                                                            | neha.raghavan@merck.com           | Scientific Committee | Pharmaceutical companies          |
| Adriana Huertas-Vazquez | Merck, Kenilworth, NJ, United States                                                                            | adriana.huertas.vazquez@merck.com | Scientific Committee | Pharmaceutical companies          |
| Jae-Hoon Sul            | Merck, Kenilworth, NJ, United States                                                                            | jae.hoon.sul@merck.com            | Scientific Committee | Pharmaceutical companies          |
| Anders Målarstig        | Pfizer, New York, NY, United States                                                                             | anders.malarstig@pfizer.com       | Scientific Committee | Pharmaceutical companies          |
| Xinli Hu                | Pfizer, New York, NY, United States                                                                             | xinli.hu@pfizer.com               | Scientific Committee | Pharmaceutical companies          |
| Åsa Hedman              | Pfizer, New York, NY, United States                                                                             | asa.hedman@pfizer.com             | Scientific Committee | Pharmaceutical companies          |
| Katherine Klinger       | Translational Sciences, Sanofi R&D, Framingham, MA, USA                                                         | katherine.klinger@sanofi.com      | Scientific Committee | Pharmaceutical companies          |
| Robert Graham           | Maze Therapeutics, San Francisco, CA, United States                                                             | rgraham@mazetx.com                | Scientific Committee | Pharmaceutical companies          |
| Dawn Waterworth         | Janssen Research & Development, LLC, Spring House, PA, United States                                            | dwaterwo@its.jnj.com              | Scientific Committee | Pharmaceutical companies          |
| Nicole Renaud           | Novartis Institutes for BioMedical Research, Cambridge, MA, United States                                       | nicole.renaud@novartis.com        | Scientific Committee | Pharmaceutical companies          |
| Ma'en Obeidat           | Novartis Institutes for BioMedical Research, Cambridge, MA, United States                                       | maen.obeidat@novartis.com         | Scientific Committee | Pharmaceutical companies          |
| Jonathan Chung          | Novartis Institutes for BioMedical Research, Cambridge, MA, United States                                       | jonathan.chung@novartis.com       | Scientific Committee | Pharmaceutical companies          |
| Jonas Zierer            | Novartis Institutes for BioMedical Research, Cambridge, MA, United States                                       | jonas.zierer@novartis.com         | Scientific Committee | Pharmaceutical companies          |
| Mari Niemi              | Novartis Institutes for BioMedical Research, Cambridge, MA, United States                                       | mari.niemi@novartis.com           | Scientific Committee | Pharmaceutical companies          |
| Samuli Ripatti          | Institute for Molecular Medicine Finland (FIMM), HiLIFE, University of Helsinki, Helsinki, Finland              | samuli.ripatti@helsinki.fi        | Scientific Committee | University of Helsinki & Biobanks |
| Johanna Schleutker      | Auria Biobank / Univ. of Turku / Hospital District of Southwest Finland, Turku, Finland                         | johanna.schleutker@utu.fi         | Scientific Committee | University of Helsinki & Biobanks |
| Markus Perola           | THL Biobank / Finnish Institute for Health and Welfare (THL), Helsinki, Finland                                 | markus.perola@thl.fi              | Scientific Committee | University of Helsinki & Biobanks |
| Mikko Arvas             | Finnish Red Cross Blood Service / Finnish Hematology Registry and Clinical Biobank, Helsinki, Finland           | mikko.arvas@veripalvelu.fi        | Scientific Committee | University of Helsinki & Biobanks |
| Olli Carpén             | Helsinki Biobank / Helsinki University and Hospital District of Helsinki and Uusimaa, Helsinki                  | olli.carpén@helsinki.fi           | Scientific Committee | University of Helsinki & Biobanks |
| Reetta Hinttala         | Northern Finland Biobank Borealis / University of Oulu / Northern Ostrobothnia Hospital District, Oulu, Finland | reetta.hinttala@oulu.fi           | Scientific Committee | University of Helsinki & Biobanks |
| Johannes Kettunen       | Northern Finland Biobank Borealis / University of Oulu / Northern Ostrobothnia Hospital District, Oulu, Finland | johannes.kettunen@oulu.fi         | Scientific Committee | University of Helsinki & Biobanks |
| Arto Mannermaa          | Biobank of Eastern Finland / University of Eastern Finland / Northern Savo Hospital District, Kuopio, Finland   | arto.mannermaa@uef.fi             | Scientific Committee | University of Helsinki & Biobanks |
| Katriina Aalto-Setälä   | Faculty of Medicine and Health Technology, Tampere University, Tampere, Finland                                 | katriina.aalto-setala@tuni.fi     | Scientific Committee | University of Helsinki & Biobanks |
| Mika Kähönen            | Finnish Clinical Biobank Tampere / University of Tampere / Pirkanmaa Hospital District, Tampere, Finland        | mika.kahonen@uta.fi               | Scientific Committee | University of Helsinki & Biobanks |

|                      |                                                                                                              |                             |                      |                                   |
|----------------------|--------------------------------------------------------------------------------------------------------------|-----------------------------|----------------------|-----------------------------------|
| Jari Laukkanen       | Central Finland Biobank / University of Jyväskylä / Central Finland Health Care District, Jyväskylä, Finland | jari.laukkanen@ksshp.fi     | Scientific Committee | University of Helsinki & Biobanks |
| Johanna Mäkelä       | FINBB - Finnish biobank cooperative                                                                          | johanna.makela@finbb.fi     | Scientific Committee | University of Helsinki & Biobanks |
| Reetta Kälviäinen    | Northern Savo Hospital District, Kuopio, Finland                                                             | reetta.kalviainen@kuh.fi    | Clinical Groups      | Neurology Group                   |
| Valtteri Julkunen    | Northern Savo Hospital District, Kuopio, Finland                                                             | valtteri.julkunen@kuh.fi    | Clinical Groups      | Neurology Group                   |
| Hilkka Soinen        | Northern Savo Hospital District, Kuopio, Finland                                                             | hilkka.soininen@uef.fi      | Clinical Groups      | Neurology Group                   |
| Anne Remes           | Northern Ostrobothnia Hospital District, Oulu, Finland                                                       | anne.remes@oulu.fi          | Clinical Groups      | Neurology Group                   |
| Mikko Hiltunen       | University of Eastern Finland, Kuopio, Finland                                                               | mikko.hiltunen@uef.fi       | Clinical Groups      | Neurology Group                   |
| Jukka Peltola        | Pirkanmaa Hospital District, Tampere, Finland                                                                | jukka.peltola@pshp.fi       | Clinical Groups      | Neurology Group                   |
| Minna Raivio         | Hospital District of Helsinki and Uusimaa, Helsinki, Finland                                                 | minna.raivio@geri.fi        | Clinical Groups      | Neurology Group                   |
| Pentti Tienari       | Hospital District of Helsinki and Uusimaa, Helsinki, Finland                                                 | pentti.tienari@hus.fi       | Clinical Groups      | Neurology Group                   |
| Juha Rinne           | Hospital District of Southwest Finland, Turku, Finland                                                       | juha.rinne@tyks.fi          | Clinical Groups      | Neurology Group                   |
| Roosa Kallionpää     | Hospital District of Southwest Finland, Turku, Finland                                                       | roosa.kallionpaa@tyks.fi    | Clinical Groups      | Neurology Group                   |
| Juulia Partanen      | Institute for Molecular Medicine Finland, HiLIFE, University of Helsinki, Finland                            | juulia.partanen@helsinki.fi | Clinical Groups      | Neurology Group                   |
| Adam Ziemann         | Abbvie, Chicago, IL, United States                                                                           | adam.ziemann@abbvie.com     | Clinical Groups      | Neurology Group                   |
| Nizar Smaoui         | Abbvie, Chicago, IL, United States                                                                           | nizar.smaoui@abbvie.com     | Clinical Groups      | Neurology Group                   |
| Anne Lehtonen        | Abbvie, Chicago, IL, United States                                                                           | anne.lehtonen@abbvie.com    | Clinical Groups      | Neurology Group                   |
| Susan Eaton          | Biogen, Cambridge, MA, United States                                                                         | susan.eaton@biogen.com      | Clinical Groups      | Neurology Group                   |
| Heiko Runz           | Biogen, Cambridge, MA, United States                                                                         | heiko.runz@biogen.com       | Clinical Groups      | Neurology Group                   |
| Sanni Lahdenperä     | Biogen, Cambridge, MA, United States                                                                         | sanni.lahdenpera@biogen.com | Clinical Groups      | Neurology Group                   |
| Shameek Biswas       | Bristol Myers Squibb, New York, NY, United States                                                            | shameek.biswas@bms.com      | Clinical Groups      | Neurology Group                   |
| Natalie Bowers       | Genentech, San Francisco, CA, United States                                                                  | bowersn1@gene.com           | Clinical Groups      | Neurology Group                   |
| Edmond Teng          | Genentech, San Francisco, CA, United States                                                                  | teng.edmond@gene.com        | Clinical Groups      | Neurology Group                   |
| Rion Pendergrass     | Genentech, San Francisco, CA, United States                                                                  | penders2@gene.com           | Clinical Groups      | Neurology Group                   |
| Fanli Xu             | GlaxoSmithKline, Brentford, United Kingdom                                                                   | chun-fang.2.xu@gsk.com      | Clinical Groups      | Neurology Group                   |
| Kirsi Auro           | GlaxoSmithKline, Espoo, Finland                                                                              | kirsi.m.auro@gsk.com        | Clinical Groups      | Neurology Group                   |
| Laura Addis          | GlaxoSmithKline, Brentford, United Kingdom                                                                   | laura.x.addis@gsk.com       | Clinical Groups      | Neurology Group                   |
| John Eicher          | GlaxoSmithKline, Brentford, United Kingdom                                                                   | john.d.eicher@gsk.com       | Clinical Groups      | Neurology Group                   |
| Qingqin S Li         | Janssen Research & Development, LLC, Titusville, NJ 08560, United States                                     | QLi2@its.jnj.com            | Clinical Groups      | Neurology Group                   |
| Karen He             | Janssen Research & Development, LLC, Spring House, PA, United States                                         | khe2@its.jnj.com            | Clinical Groups      | Neurology Group                   |
| Ekaterina Khramtsova | Janssen Research & Development, LLC, Spring House, PA, United States                                         | ekhramts@its.jnj.com        | Clinical Groups      | Neurology Group                   |
| Neha Raghavan        | Merck, Kenilworth, NJ, United States                                                                         | neha.raghavan@merck.com     | Clinical Groups      | Neurology Group                   |
| Martti Färkkilä      | Hospital District of Helsinki and Uusimaa, Helsinki, Finland                                                 | martti.farkkila@hus.fi      | Clinical Groups      | Gastroenterology Group            |



|                         |                                                                                                                                                                         |                                             |                 |                        |
|-------------------------|-------------------------------------------------------------------------------------------------------------------------------------------------------------------------|---------------------------------------------|-----------------|------------------------|
| Jukka Koskela           | Hospital District of Helsinki and Uusimaa, Helsinki, Finland                                                                                                            | jukka.koskela@helsinki.fi                   | Clinical Groups | Gastroenterology Group |
| Sampsa Pikkarainen      | Hospital District of Helsinki and Uusimaa, Helsinki, Finland                                                                                                            | sampsa.pikkarainen@hus.fi                   | Clinical Groups | Gastroenterology Group |
| Airi Jussila            | Pirkanmaa Hospital District, Tampere, Finland                                                                                                                           | airi.jussila@pshp.fi                        | Clinical Groups | Gastroenterology Group |
| Katri Kaukinen          | Pirkanmaa Hospital District, Tampere, Finland                                                                                                                           | katri.kaukinen@tuni.fi                      | Clinical Groups | Gastroenterology Group |
| Timo Blomster           | Northern Ostrobothnia Hospital District, Oulu, Finland                                                                                                                  | timo.blomster@ppshp.fi                      | Clinical Groups | Gastroenterology Group |
| Mikko Kiviniemi         | Northern Savo Hospital District, Kuopio, Finland                                                                                                                        | mikko.kiviniemi@kuh.fi                      | Clinical Groups | Gastroenterology Group |
| Markku Voutilainen      | Hospital District of Southwest Finland, Turku, Finland                                                                                                                  | markku.voutilainen@tyks.fi                  | Clinical Groups | Gastroenterology Group |
| Mark Daly               | Institute for Molecular Medicine, Finland (FIMM), HiLIFE, University of Helsinki, Helsinki, Finland; Broad Institute of MIT and Harvard; Massachusetts General Hospital | mark.daly@helsinki.fi                       | Clinical Groups | Gastroenterology Group |
| Jeffrey Waring          | Abbvie, Chicago, IL, United States                                                                                                                                      | jeff.waring@abbvie.com                      | Clinical Groups | Gastroenterology Group |
| Nizar Smaoui            | Abbvie, Chicago, IL, United States                                                                                                                                      | nizar.smaoui@abbvie.com                     | Clinical Groups | Gastroenterology Group |
| Fedik Rahimov           | Abbvie, Chicago, IL, United States                                                                                                                                      | fedik.rahimov@abbvie.com                    | Clinical Groups | Gastroenterology Group |
| Anne Lehtonen           | Abbvie, Chicago, IL, United States                                                                                                                                      | anne.lehtonen@abbvie.com                    | Clinical Groups | Gastroenterology Group |
| Tim Lu                  | Genentech, San Francisco, CA, United States                                                                                                                             | lut8@gene.com                               | Clinical Groups | Gastroenterology Group |
| Natalie Bowers          | Genentech, San Francisco, CA, United States                                                                                                                             | bowersn1@gene.com                           | Clinical Groups | Gastroenterology Group |
| Rion Pendergrass        | Genentech, San Francisco, CA, United States                                                                                                                             | penders2@gene.com                           | Clinical Groups | Gastroenterology Group |
| Linda McCarthy          | GlaxoSmithKline, Brentford, United Kingdom                                                                                                                              | linda.c.mccarthy@gsk.com                    | Clinical Groups | Gastroenterology Group |
| Amy Hart                | Janssen Research & Development, LLC, Spring House, PA, United States                                                                                                    | ahart13@its.jnj.com                         | Clinical Groups | Gastroenterology Group |
| Meijian Guan            | Janssen Research & Development, LLC, Spring House, PA, United States                                                                                                    | mguan4@its.jnj.com                          | Clinical Groups | Gastroenterology Group |
| Jason Miller            | Merck, Kenilworth, NJ, United States                                                                                                                                    | jason.miller4@merck.com                     | Clinical Groups | Gastroenterology Group |
| Kirsi Kalpala           | Pfizer, New York, NY, United States                                                                                                                                     | kirsi.kalpala@pfizer.com                    | Clinical Groups | Gastroenterology Group |
| Melissa Miller          | Pfizer, New York, NY, United States                                                                                                                                     | melissa.r.miller@pfizer.com                 | Clinical Groups | Gastroenterology Group |
| Xinli Hu                | Pfizer, New York, NY, United States                                                                                                                                     | xinli.hu@pfizer.com                         | Clinical Groups | Gastroenterology Group |
| Kari Eklund             | Hospital District of Helsinki and Uusimaa, Helsinki, Finland                                                                                                            | kari eklund@hus.fi                          | Clinical Groups | Rheumatology Group     |
| Antti Palomäki          | Hospital District of Southwest Finland, Turku, Finland                                                                                                                  | ajpalo@utu.fi                               | Clinical Groups | Rheumatology Group     |
| Pia Isomäki             | Pirkanmaa Hospital District, Tampere, Finland                                                                                                                           | pia.isomaki@pshp.fi                         | Clinical Groups | Rheumatology Group     |
| Laura Pirilä            | Hospital District of Southwest Finland, Turku, Finland                                                                                                                  | laura.pirila@fimnet.fi,laura.pirila@tyks.fi | Clinical Groups | Rheumatology Group     |
| Oili Kaipainen-Seppänen | Northern Savo Hospital District, Kuopio, Finland                                                                                                                        | oili.kaipainen-seppanen@kuh.fi              | Clinical Groups | Rheumatology Group     |
| Johanna Huhtakangas     | Northern Ostrobothnia Hospital District, Oulu, Finland                                                                                                                  | johanna.huhtakangas@kuh.fi                  | Clinical Groups | Rheumatology Group     |
| Nina Mars               | Institute for Molecular Medicine Finland (FIMM), HiLIFE, University of Helsinki, Helsinki, Finland                                                                      | nina.mars@helsinki.fi                       | Clinical Groups | Rheumatology Group     |
| Jeffrey Waring          | Abbvie, Chicago, IL, United States                                                                                                                                      | jeff.waring@abbvie.com                      | Clinical Groups | Rheumatology Group     |
| Fedik Rahimov           | Abbvie, Chicago, IL, United States                                                                                                                                      | fedik.rahimov@abbvie.com                    | Clinical Groups | Rheumatology Group     |

|                        |                                                                                                                                    |                                  |                 |                                |
|------------------------|------------------------------------------------------------------------------------------------------------------------------------|----------------------------------|-----------------|--------------------------------|
| Apinya Lertratanakul   | Abbvie, Chicago, IL, United States                                                                                                 | apinya.lertratanakul@abbvie.com  | Clinical Groups | Rheumatology Group             |
| Nizar Smaoui           | Abbvie, Chicago, IL, United States                                                                                                 | nizar.smaoui@abbvie.com          | Clinical Groups | Rheumatology Group             |
| Anne Lehtonen          | Abbvie, Chicago, IL, United States                                                                                                 | anne.lehtonen@abbvie.com         | Clinical Groups | Rheumatology Group             |
| Coralie Viollet        | AstraZeneca, Cambridge, United Kingdom                                                                                             | coralie.viollet@astrazeneca.com  | Clinical Groups | Rheumatology Group             |
| Marla Hochfeld         | Bristol Myers Squibb, New York, NY, United States                                                                                  | mhochfeld@celgene.com            | Clinical Groups | Rheumatology Group             |
| Natalie Bowers         | Genentech, San Francisco, CA, United States                                                                                        | bowersn1@gene.com                | Clinical Groups | Rheumatology Group             |
| Rion Pendergrass       | Genentech, San Francisco, CA, United States                                                                                        | penders2@gene.com                | Clinical Groups | Rheumatology Group             |
| Jorge Esparza Gordillo | GlaxoSmithKline, Brentford, United Kingdom                                                                                         | jorge.x.esparza-gordillo@gsk.com | Clinical Groups | Rheumatology Group             |
| Kirsi Auro             | GlaxoSmithKline, Espoo, Finland                                                                                                    | kirsi.m.auro@gsk.com             | Clinical Groups | Rheumatology Group             |
| Dawn Waterworth        | Janssen Research & Development, LLC, Spring House, PA, United States                                                               | dwaterwo@its.jnj.com             | Clinical Groups | Rheumatology Group             |
| Fabiana Farias         | Merck, Kenilworth, NJ, United States                                                                                               | fabiana.farias@merck.com         | Clinical Groups | Rheumatology Group             |
| Kirsi Kalpala          | Pfizer, New York, NY, United States                                                                                                | kirsi.kalpala@pfizer.com         | Clinical Groups | Rheumatology Group             |
| Nan Bing               | Pfizer, New York, NY, United States                                                                                                | nan.bing@pfizer.com              | Clinical Groups | Rheumatology Group             |
| Xinli Hu               | Pfizer, New York, NY, United States                                                                                                | xinli.hu@pfizer.com              | Clinical Groups | Rheumatology Group             |
| Tarja Laitinen         | Pirkanmaa Hospital District, Tampere, Finland                                                                                      | tarja.laitinen@pshp.fi           | Clinical Groups | Pulmonology Group              |
| Margit Pelkonen        | Northern Savo Hospital District, Kuopio, Finland                                                                                   | margit.pelkonen@kuh.fi           | Clinical Groups | Pulmonology Group              |
| Paula Kauppi           | Hospital District of Helsinki and Uusimaa, Helsinki, Finland                                                                       | paula.kauppi@hus.fi              | Clinical Groups | Pulmonology Group              |
| Hannu Kankaanranta     | University of Gothenburg, Gothenburg, Sweden/ Seinäjoki Central Hospital, Seinäjoki, Finland/ Tampere University, Tampere, Finland | hannu.kankaanranta@tuni.fi       | Clinical Groups | Pulmonology Group              |
| Terttu Harju           | Northern Ostrobothnia Hospital District, Oulu, Finland                                                                             | terttu.harju@oulu.fi             | Clinical Groups | Pulmonology Group              |
| Riitta Lahesmaa        | Hospital District of Southwest Finland, Turku, Finland                                                                             | rilahes@utu.fi                   | Clinical Groups | Pulmonology Group              |
| Nizar Smaoui           | Abbvie, Chicago, IL, United States                                                                                                 | nizar.smaoui@abbvie.com          | Clinical Groups | Pulmonology Group              |
| Coralie Viollet        | AstraZeneca, Cambridge, United Kingdom                                                                                             | coralie.viollet@astrazeneca.com  | Clinical Groups | Pulmonology Group              |
| Susan Eaton            | Biogen, Cambridge, MA, United States                                                                                               | susan.eaton@biogen.com           | Clinical Groups | Pulmonology Group              |
| Hubert Chen            | Genentech, San Francisco, CA, United States                                                                                        | chenh37@gene.com                 | Clinical Groups | Pulmonology Group              |
| Rion Pendergrass       | Genentech, San Francisco, CA, United States                                                                                        | penders2@gene.com                | Clinical Groups | Pulmonology Group              |
| Natalie Bowers         | Genentech, San Francisco, CA, United States                                                                                        | bowersn1@gene.com                | Clinical Groups | Pulmonology Group              |
| Joanna Betts           | GlaxoSmithKline, Brentford, United Kingdom                                                                                         | joanna.c.betts@gsk.com           | Clinical Groups | Pulmonology Group              |
| Kirsi Auro             | GlaxoSmithKline, Espoo, Finland                                                                                                    | kirsi.m.auro@gsk.com             | Clinical Groups | Pulmonology Group              |
| Rajashree Mishra       | GlaxoSmithKline, Brentford, United Kingdom                                                                                         | rajashree.x.mishra@gsk.com       | Clinical Groups | Pulmonology Group              |
| Majd Mouded            | Novartis, Basel, Switzerland                                                                                                       | majd.mouded@novartis.com         | Clinical Groups | Pulmonology Group              |
| Debby Ngo              | Novartis, Basel, Switzerland                                                                                                       | debby.ngo@novartis.com           | Clinical Groups | Pulmonology Group              |
| Teemu Niiranen         | Finnish Institute for Health and Welfare (THL), Helsinki, Finland                                                                  | teemu.niiranen@thl.fi            | Clinical Groups | Cardiometabolic Diseases Group |

|                       |                                                                                                                                                                                             |                                   |                 |                                |
|-----------------------|---------------------------------------------------------------------------------------------------------------------------------------------------------------------------------------------|-----------------------------------|-----------------|--------------------------------|
| Felix Vaura           | Finnish Institute for Health and Welfare (THL), Helsinki, Finland                                                                                                                           | fechva@utu.fi                     | Clinical Groups | Cardiometabolic Diseases Group |
| Veikko Salomaa        | Finnish Institute for Health and Welfare (THL), Helsinki, Finland                                                                                                                           | veikko.salomaa@thl.fi             | Clinical Groups | Cardiometabolic Diseases Group |
| Kaj Metsärinne        | Hospital District of Southwest Finland, Turku, Finland                                                                                                                                      | kaj.metsarinne@tyks.fi            | Clinical Groups | Cardiometabolic Diseases Group |
| Jenni Aittokallio     | Hospital District of Southwest Finland, Turku, Finland                                                                                                                                      | jemato@utu.fi                     | Clinical Groups | Cardiometabolic Diseases Group |
| Mika Kähönen          | Pirkanmaa Hospital District, Tampere, Finland                                                                                                                                               | mika.kahonen@uta.fi               | Clinical Groups | Cardiometabolic Diseases Group |
| Jussi Hernesniemi     | Pirkanmaa Hospital District, Tampere, Finland                                                                                                                                               | jussi.hernesniemi@tuni.fi         | Clinical Groups | Cardiometabolic Diseases Group |
| Daniel Gordin         | Hospital District of Helsinki and Uusimaa, Helsinki, Finland                                                                                                                                | daniel.gordin@hus.fi              | Clinical Groups | Cardiometabolic Diseases Group |
| Juha Sinisalo         | Hospital District of Helsinki and Uusimaa, Helsinki, Finland                                                                                                                                | juha.sinisalo@hus.fi              | Clinical Groups | Cardiometabolic Diseases Group |
| Marja-Riitta Taskinen | Hospital District of Helsinki and Uusimaa, Helsinki, Finland                                                                                                                                | marja-riitta.taskinen@helsinki.fi | Clinical Groups | Cardiometabolic Diseases Group |
| Tiinamaija Tuomi      | Hospital District of Helsinki and Uusimaa, Helsinki, Finland                                                                                                                                | tiinamaija.tuomi@hus.fi           | Clinical Groups | Cardiometabolic Diseases Group |
| Timo Hiltunen         | Hospital District of Helsinki and Uusimaa, Helsinki, Finland                                                                                                                                | timo.hiltunen@hus.fi              | Clinical Groups | Cardiometabolic Diseases Group |
| Jari Laukkanen        | Central Finland Health Care District, Jyväskylä, Finland                                                                                                                                    | jari.laukkanen@ksshp.fi           | Clinical Groups | Cardiometabolic Diseases Group |
| Amanda Elliott        | Institute for Molecular Medicine Finland (FIMM), HiLIFE, University of Helsinki, Helsinki, Finland; Broad Institute, Cambridge, MA, USA and Massachusetts General Hospital, Boston, MA, USA | aelliott@broadinstitute.org       | Clinical Groups | Cardiometabolic Diseases Group |
| Mary Pat Reeve        | Institute for Molecular Medicine Finland (FIMM), HiLIFE, University of Helsinki, Helsinki, Finland                                                                                          | mary.reeve@helsinki.fi            | Clinical Groups | Cardiometabolic Diseases Group |
| Sanni Ruotsalainen    | Institute for Molecular Medicine Finland (FIMM), HiLIFE, University of Helsinki, Helsinki, Finland                                                                                          | sanni.ruotsalainen@helsinki.fi    | Clinical Groups | Cardiometabolic Diseases Group |
| Dirk Paul             | Astra Zeneca, Cambridge, United Kingdom                                                                                                                                                     | dirk.paul@astrazeneca.com         | Clinical Groups | Cardiometabolic Diseases Group |
| Natalie Bowers        | Genentech, San Francisco, CA, United States                                                                                                                                                 | bowersn1@gene.com                 | Clinical Groups | Cardiometabolic Diseases Group |
| Rion Pendergrass      | Genentech, San Francisco, CA, United States                                                                                                                                                 | penders2@gene.com                 | Clinical Groups | Cardiometabolic Diseases Group |
| Audrey Chu            | GlaxoSmithKline, Brentford, United Kingdom                                                                                                                                                  | audrey.y.chu@gsk.com              | Clinical Groups | Cardiometabolic Diseases Group |
| Kirsi Auro            | GlaxoSmithKline, Espoo, Finland                                                                                                                                                             | kirsi.m.auro@gsk.com              | Clinical Groups | Cardiometabolic Diseases Group |
| Dermot Reilly         | Janssen Research & Development, LLC, Boston, MA, United States                                                                                                                              | dreill11@its.jnj.com              | Clinical Groups | Cardiometabolic Diseases Group |
| Mike Mendelson        | Novartis, Boston, MA, United States                                                                                                                                                         | mike.mendelson@novartis.com       | Clinical Groups | Cardiometabolic Diseases Group |

|                      |                                                                                                                                                                        |                                 |                 |                                |
|----------------------|------------------------------------------------------------------------------------------------------------------------------------------------------------------------|---------------------------------|-----------------|--------------------------------|
| Jaakko Parkkinen     | Pfizer, New York, NY, United States                                                                                                                                    | jaakko.parkkinen@pfizer.com     | Clinical Groups | Cardiometabolic Diseases Group |
| Melissa Miller       | Pfizer, New York, NY, United States                                                                                                                                    | melissa.r.miller@pfizer.com     | Clinical Groups | Cardiometabolic Diseases Group |
| Tuomo Meretoja       | Department of Breast Surgery, Helsinki University Hospital Comprehensive Cancer Center and University of Helsinki, Helsinki, Finland                                   | tuomo.meretoja@hus.fi           | Clinical Groups | Oncology Group                 |
| Heikki Joensuu       | Department of Oncology, Helsinki University Hospital Comprehensive Cancer Center and University of Helsinki, Helsinki, Finland                                         | heikki.joensuu@hus.fi           | Clinical Groups | Oncology Group                 |
| Olli Carpén          | Hospital District of Helsinki and Uusimaa, Helsinki, Finland                                                                                                           | olli.carpén@helsinki.fi         | Clinical Groups | Oncology Group                 |
| Johanna Mattson      | Hospital District of Helsinki and Uusimaa, Helsinki, Finland                                                                                                           | johanna.mattson@hus.fi          | Clinical Groups | Oncology Group                 |
| Eveliina Salminen    | Hospital District of Helsinki and Uusimaa, Helsinki, Finland                                                                                                           | eveliina.e.salminen@hus.fi      | Clinical Groups | Oncology Group                 |
| Annika Auranen       | Pirkanmaa Hospital District, Tampere, Finland                                                                                                                          | anaura@utu.fi                   | Clinical Groups | Oncology Group                 |
| Peeter Karihtala     | Department of Oncology, Helsinki University Hospital Comprehensive Cancer Center and University of Helsinki, Helsinki, Finland                                         | peeter.karihtala@hus.fi         | Clinical Groups | Oncology Group                 |
| Päivi Auvinen        | Northern Savo Hospital District, Kuopio, Finland                                                                                                                       | paivi.auvinen@kuh.fi            | Clinical Groups | Oncology Group                 |
| Klaus Elenius        | Hospital District of Southwest Finland, Turku, Finland                                                                                                                 | klaus.elenius@utu.fi            | Clinical Groups | Oncology Group                 |
| Johanna Schleutker   | Hospital District of Southwest Finland, Turku, Finland                                                                                                                 | johanna.schleutker@utu.fi       | Clinical Groups | Oncology Group                 |
| Esa Pitkänen         | Institute for Molecular Medicine Finland (FIMM), HiLIFE, University of Helsinki, Helsinki, Finland                                                                     | esa.pitkanen@helsinki.fi        | Clinical Groups | Oncology Group                 |
| Nina Mars            | Institute for Molecular Medicine Finland (FIMM), HiLIFE, University of Helsinki, Helsinki, Finland                                                                     | nina.mars@helsinki.fi           | Clinical Groups | Oncology Group                 |
| Mark Daly            | Institute for Molecular Medicine Finland (FIMM), HiLIFE, University of Helsinki, Helsinki, Finland; Broad Institute of MIT and Harvard; Massachusetts General Hospital | mark.daly@helsinki.fi           | Clinical Groups | Oncology Group                 |
| Relja Popovic        | Abbvie, Chicago, IL, United States                                                                                                                                     | relja.popovic@abbvie.com        | Clinical Groups | Oncology Group                 |
| Jeffrey Waring       | Abbvie, Chicago, IL, United States                                                                                                                                     | jeff.waring@abbvie.com          | Clinical Groups | Oncology Group                 |
| Bridget Riley-Gillis | Abbvie, Chicago, IL, United States                                                                                                                                     | bridget.rileygillis@abbvie.com  | Clinical Groups | Oncology Group                 |
| Anne Lehtonen        | Abbvie, Chicago, IL, United States                                                                                                                                     | anne.lehtonen@abbvie.com        | Clinical Groups | Oncology Group                 |
| Margarete Fabre      | AstraZeneca, Cambridge, United Kingdom                                                                                                                                 | margarete.fabre@astrazeneca.com | Clinical Groups | Oncology Group                 |
| Jennifer Schutzman   | Genentech, San Francisco, CA, United States                                                                                                                            | schutzman.jennifer@gene.com     | Clinical Groups | Oncology Group                 |
| Natalie Bowers       | Genentech, San Francisco, CA, United States                                                                                                                            | bowersn1@gene.com               | Clinical Groups | Oncology Group                 |
| Rion Pendergrass     | Genentech, San Francisco, CA, United States                                                                                                                            | penders2@gene.com               | Clinical Groups | Oncology Group                 |
| Diptee Kulkarni      | GlaxoSmithKline, Brentford, United Kingdom                                                                                                                             | diptee.a.kulkarni@gsk.com       | Clinical Groups | Oncology Group                 |
| Kirsi Auro           | GlaxoSmithKline, Espoo, Finland                                                                                                                                        | kirsi.m.auro@gsk.com            | Clinical Groups | Oncology Group                 |
| Alessandro Porello   | Janssen Research & Development, LLC, Spring House, PA, United States                                                                                                   | APorrell@ITS.JNJ.com            | Clinical Groups | Oncology Group                 |
| Andrey Loboda        | Merck, Kenilworth, NJ, United States                                                                                                                                   | andrey_loboda@merck.com         | Clinical Groups | Oncology Group                 |

|                          |                                                                                                                                               |                                 |                 |                     |
|--------------------------|-----------------------------------------------------------------------------------------------------------------------------------------------|---------------------------------|-----------------|---------------------|
| Heli Lehtonen            | Pfizer, New York, NY, United States                                                                                                           | heli.lehtonen@pfizer.com        | Clinical Groups | Oncology Group      |
| Stefan McDonough         | Pfizer, New York, NY, United States                                                                                                           | stefan.McDonough@pfizer.com     | Clinical Groups | Oncology Group      |
| Sauli Vuoti              | Janssen-Cilag Oy, Espoo, Finland                                                                                                              | svuoti@its.jnj.com              | Clinical Groups | Oncology Group      |
| Kai Kaarniranta          | Northern Savo Hospital District, Kuopio, Finland; Department of Molecular Genetics, University of Lodz, Lodz, Poland                          | kai.kaarniranta@uef.fi          | Clinical Groups | Ophthalmology Group |
| Joni A Turunen           | Helsinki University Hospital and University of Helsinki, Helsinki, Finland; Eye Genetics Group, Folkhälsan Research Center, Helsinki, Finland | joni.turunen@helsinki.fi        | Clinical Groups | Ophthalmology Group |
| Terhi Ollila             | Hospital District of Helsinki and Uusimaa, Helsinki, Finland                                                                                  | terhi.ollila@hus.fi             | Clinical Groups | Ophthalmology Group |
| Hannu Uusitalo           | Pirkanmaa Hospital District, Tampere, Finland                                                                                                 | hannu.uusitalo@tuni.fi          | Clinical Groups | Ophthalmology Group |
| Juha Karjalainen         | Institute for Molecular Medicine Finland (FIMM), HiLIFE, University of Helsinki, Helsinki, Finland                                            | juha.karjalainen@helsinki.fi    | Clinical Groups | Ophthalmology Group |
| Esa Pitkanen             | Institute for Molecular Medicine Finland (FIMM), HiLIFE, University of Helsinki, Helsinki, Finland                                            | esa.pitkanen@helsinki.fi        | Clinical Groups | Ophthalmology Group |
| Mengzhen Liu             | Abbvie, Chicago, IL, United States                                                                                                            | mengzhen.liu@abbvie.com         | Clinical Groups | Ophthalmology Group |
| Heiko Runz               | Biogen, Cambridge, MA, United States                                                                                                          | heiko.runz@biogen.com           | Clinical Groups | Ophthalmology Group |
| Stephanie Loomis         | Biogen, Cambridge, MA, United States                                                                                                          | stephanie.loomis@biogen.com     | Clinical Groups | Ophthalmology Group |
| Erich Strauss            | Genentech, San Francisco, CA, United States                                                                                                   | strauss.erich@gene.com          | Clinical Groups | Ophthalmology Group |
| Natalie Bowers           | Genentech, San Francisco, CA, United States                                                                                                   | bowersn1@gene.com               | Clinical Groups | Ophthalmology Group |
| Hao Chen                 | Genentech, San Francisco, CA, United States                                                                                                   | haoc@gene.com                   | Clinical Groups | Ophthalmology Group |
| Rion Pendergrass         | Genentech, San Francisco, CA, United States                                                                                                   | penders2@gene.com               | Clinical Groups | Ophthalmology Group |
| Kaisa Tasanen            | Northern Ostrobothnia Hospital District, Oulu, Finland                                                                                        | kaisa.tasanen-maatta@oulu.fi    | Clinical Groups | Dermatology Group   |
| Laura Huilaja            | Northern Ostrobothnia Hospital District, Oulu, Finland                                                                                        | laura.huilaja@oulu.fi           | Clinical Groups | Dermatology Group   |
| Katariina Hannula-Jouppi | Hospital District of Helsinki and Uusimaa, Helsinki, Finland                                                                                  | katariina.hannula-jouppi@hus.fi | Clinical Groups | Dermatology Group   |
| Teea Salmi               | Pirkanmaa Hospital District, Tampere, Finland                                                                                                 | teea.salmi@pshp.fi              | Clinical Groups | Dermatology Group   |
| Sirkku Peltonen          | Hospital District of Southwest Finland, Turku, Finland                                                                                        | sipelto@utu.fi                  | Clinical Groups | Dermatology Group   |
| Leena Koulu              | Hospital District of Southwest Finland, Turku, Finland                                                                                        | leena.koulu@tyks.fi             | Clinical Groups | Dermatology Group   |
| Nizar Smaoui             | Abbvie, Chicago, IL, United States                                                                                                            | nizar.smaoui@abbvie.com         | Clinical Groups | Dermatology Group   |
| Fedik Rahimov            | Abbvie, Chicago, IL, United States                                                                                                            | fedik.rahimov@abbvie.com        | Clinical Groups | Dermatology Group   |
| Anne Lehtonen            | Abbvie, Chicago, IL, United States                                                                                                            | anne.lehtonen@abbvie.com        | Clinical Groups | Dermatology Group   |
| David Choy               | Genentech, San Francisco, CA, United States                                                                                                   | choy.david@gene.com             | Clinical Groups | Dermatology Group   |
| Rion Pendergrass         | Genentech, San Francisco, CA, United States                                                                                                   | penders2@gene.com               | Clinical Groups | Dermatology Group   |
| Dawn Waterworth          | Janssen Research & Development, LLC, Spring House, PA, United States                                                                          | dwaterwo@its.jnj.com            | Clinical Groups | Dermatology Group   |
| Kirsi Kalpala            | Pfizer, New York, NY, United States                                                                                                           | kirsi.kalpala@pfizer.com        | Clinical Groups | Dermatology Group   |
| Ying Wu                  | Pfizer, New York, NY, United States                                                                                                           | ying.wu3@pfizer.com             | Clinical Groups | Dermatology Group   |

|                         |                                                                                                                                                                                             |                                 |                 |                                       |
|-------------------------|---------------------------------------------------------------------------------------------------------------------------------------------------------------------------------------------|---------------------------------|-----------------|---------------------------------------|
| Pirkko Pussinen         | Hospital District of Helsinki and Uusimaa, Helsinki, Finland                                                                                                                                | pirkko.pussinen@helsinki.fi     | Clinical Groups | Odontology Group                      |
| Aino Salminen           | Hospital District of Helsinki and Uusimaa, Helsinki, Finland                                                                                                                                | aino.m.salminen@helsinki.fi     | Clinical Groups | Odontology Group                      |
| Tuula Salo              | Hospital District of Helsinki and Uusimaa, Helsinki, Finland                                                                                                                                | tuula.salo@helsinki.fi          | Clinical Groups | Odontology Group                      |
| David Rice              | Hospital District of Helsinki and Uusimaa, Helsinki, Finland                                                                                                                                | david.rice@helsinki.fi          | Clinical Groups | Odontology Group                      |
| Pekka Nieminen          | Hospital District of Helsinki and Uusimaa, Helsinki, Finland                                                                                                                                | pekka.nieminen@helsinki.fi      | Clinical Groups | Odontology Group                      |
| Ulla Palotie            | Hospital District of Helsinki and Uusimaa, Helsinki, Finland                                                                                                                                | ulla.palotie@helsinki.fi        | Clinical Groups | Odontology Group                      |
| Maria Siponen           | Northern Savo Hospital District, Kuopio, Finland                                                                                                                                            | maria.siponen@uef.fi            | Clinical Groups | Odontology Group                      |
| Liisa Suominen          | Northern Savo Hospital District, Kuopio, Finland                                                                                                                                            | liisa.suominen@uef.fi           | Clinical Groups | Odontology Group                      |
| Päivi Mäntylä           | Northern Savo Hospital District, Kuopio, Finland                                                                                                                                            | paivi.mantyla@uef.fi            | Clinical Groups | Odontology Group                      |
| Ulvi Gursoy             | Hospital District of Southwest Finland, Turku, Finland                                                                                                                                      | ulvi.gursoy@utu.fi              | Clinical Groups | Odontology Group                      |
| Vuokko Anttonen         | Northern Ostrobothnia Hospital District, Oulu, Finland                                                                                                                                      | vuokko.anttonen@oulu.fi         | Clinical Groups | Odontology Group                      |
| Kirsi Sipilä            | Research Unit of Oral Health Sciences Faculty of Medicine, University of Oulu, Oulu, Finland; Medical Research Center, Oulu, Oulu University Hospital and University of Oulu, Oulu, Finland | kirsi.sipila@oulu.fi            | Clinical Groups | Odontology Group                      |
| Rion Pendergrass        | Genentech, San Francisco, CA, United States                                                                                                                                                 | pendergrass.sarah@gene.com      | Clinical Groups | Odontology Group                      |
| Hannele Laivuori        | Institute for Molecular Medicine Finland (FIMM), HiLIFE, University of Helsinki, Helsinki, Finland                                                                                          | hannele.laivuori@helsinki.fi    | Clinical Groups | Women's Health and Reproduction Group |
| Venla Kurra             | Pirkanmaa Hospital District, Tampere, Finland                                                                                                                                               | venla.kurra@tuni.fi             | Clinical Groups | Women's Health and Reproduction Group |
| Laura Kotaniemi-Talonen | Pirkanmaa Hospital District, Tampere, Finland                                                                                                                                               | laura.kotaniemi-talonen@tuni.fi | Clinical Groups | Women's Health and Reproduction Group |
| Oskari Heikinheimo      | Hospital District of Helsinki and Uusimaa, Helsinki, Finland                                                                                                                                | oskari.heikinheimo@helsinki.fi  | Clinical Groups | Women's Health and Reproduction Group |
| Ilkka Kalliala          | Hospital District of Helsinki and Uusimaa, Helsinki, Finland                                                                                                                                | ilkka.kalliala@hus.fi           | Clinical Groups | Women's Health and Reproduction Group |
| Lauri Aaltonen          | Hospital District of Helsinki and Uusimaa, Helsinki, Finland                                                                                                                                | lauri.aaltonen@helsinki.fi      | Clinical Groups | Women's Health and Reproduction Group |
| Varpu Jokimaa           | Hospital District of Southwest Finland, Turku, Finland                                                                                                                                      | varpu.jokimaa@utu.fi            | Clinical Groups | Women's Health and Reproduction Group |
| Johannes Kettunen       | Northern Ostrobothnia Hospital District, Oulu, Finland                                                                                                                                      | Johannes.Kettunen@oulu.fi       | Clinical Groups | Women's Health and Reproduction Group |
| Marja Väärasmäki        | Northern Ostrobothnia Hospital District, Oulu, Finland                                                                                                                                      | marja.vaarasmaki@oulu.fi        | Clinical Groups | Women's Health and Reproduction Group |
| Outi Uimari             | Northern Ostrobothnia Hospital District, Oulu, Finland                                                                                                                                      | outi.uimari@oulu.fi             | Clinical Groups | Women's Health and                    |

|                     |                                                                                                                                                                        |                              |                        |                                              |
|---------------------|------------------------------------------------------------------------------------------------------------------------------------------------------------------------|------------------------------|------------------------|----------------------------------------------|
|                     |                                                                                                                                                                        |                              |                        | <b>Reproduction Group</b>                    |
| Laure Morin-Papunen | Northern Ostrobothnia Hospital District, Oulu, Finland                                                                                                                 | lmp@cc.oulu.fi               | <b>Clinical Groups</b> | <b>Women's Health and Reproduction Group</b> |
| Maarit Niinimäki    | Northern Ostrobothnia Hospital District, Oulu, Finland                                                                                                                 | maarit.niinimaki@oulu.fi     | <b>Clinical Groups</b> | <b>Women's Health and Reproduction Group</b> |
| Terhi Pilttonen     | Northern Ostrobothnia Hospital District, Oulu, Finland                                                                                                                 | terhi.pilttonen@oulu.fi      | <b>Clinical Groups</b> | <b>Women's Health and Reproduction Group</b> |
| Katja Kivinen       | Institute for Molecular Medicine Finland (FIMM), HiLIFE, University of Helsinki, Helsinki, Finland                                                                     | katja.kivinen@helsinki.fi    | <b>Clinical Groups</b> | <b>Women's Health and Reproduction Group</b> |
| Elisabeth Widen     | Institute for Molecular Medicine Finland (FIMM), HiLIFE, University of Helsinki, Helsinki, Finland                                                                     | elisabeth.widen@helsinki.fi  | <b>Clinical Groups</b> | <b>Women's Health and Reproduction Group</b> |
| Taru Tukiainen      | Institute for Molecular Medicine Finland (FIMM), HiLIFE, University of Helsinki, Helsinki, Finland                                                                     | taru.tukiainen@helsinki.fi   | <b>Clinical Groups</b> | <b>Women's Health and Reproduction Group</b> |
| Mary Pat Reeve      | Institute for Molecular Medicine Finland (FIMM), HiLIFE, University of Helsinki, Helsinki, Finland                                                                     | mary.reeve@helsinki.fi       | <b>Clinical Groups</b> | <b>Women's Health and Reproduction Group</b> |
| Mark Daly           | Institute for Molecular Medicine Finland (FIMM), HiLIFE, University of Helsinki, Helsinki, Finland; Broad Institute of MIT and Harvard; Massachusetts General Hospital | mark.daly@helsinki.fi        | <b>Clinical Groups</b> | <b>Women's Health and Reproduction Group</b> |
| Niko Välimäki       | University of Helsinki, Helsinki, Finland                                                                                                                              | niko.valimaki@helsinki.fi    | <b>Clinical Groups</b> | <b>Women's Health and Reproduction Group</b> |
| Eija Laakkonen      | University of Jyväskylä, Jyväskylä, Finland                                                                                                                            | eija.k.laakkonen@jyu.fi      | <b>Clinical Groups</b> | <b>Women's Health and Reproduction Group</b> |
| Jaakko Tyrmi        | University of Oulu, Oulu, Finland / University of Tampere, Tampere, Finland                                                                                            | jaakko.tyrmi@oulu.fi         | <b>Clinical Groups</b> | <b>Women's Health and Reproduction Group</b> |
| Heidi Silven        | University of Oulu, Oulu, Finland                                                                                                                                      | heidi.silven@student.oulu.fi | <b>Clinical Groups</b> | <b>Women's Health and Reproduction Group</b> |
| Eeva Sliz           | University of Oulu, Oulu, Finland                                                                                                                                      | eeva.sliz@oulu.fi            | <b>Clinical Groups</b> | <b>Women's Health and Reproduction Group</b> |
| Riikka Arffman      | University of Oulu, Oulu, Finland                                                                                                                                      | riikka.arffman@oulu.fi       | <b>Clinical Groups</b> | <b>Women's Health and Reproduction Group</b> |
| Susanna Savukoski   | University of Oulu, Oulu, Finland                                                                                                                                      | susanna.savukoski@oulu.fi    | <b>Clinical Groups</b> | <b>Women's Health and Reproduction Group</b> |
| Triin Laisk         | Estonian biobank, Tartu, Estonia                                                                                                                                       | triin.laisk@ut.ee            | <b>Clinical Groups</b> | <b>Women's Health and Reproduction Group</b> |
| Natalia Pujol       | Estonian biobank, Tartu, Estonia                                                                                                                                       | natalia.pujolgualdo@oulu.fi  | <b>Clinical Groups</b> | <b>Women's Health and</b>                    |

|                            |                                                                                                                                                                                                              |                                    |                        |                                              |
|----------------------------|--------------------------------------------------------------------------------------------------------------------------------------------------------------------------------------------------------------|------------------------------------|------------------------|----------------------------------------------|
|                            |                                                                                                                                                                                                              |                                    |                        | <b>Reproduction Group</b>                    |
| Mengzhen Liu               | Abbvie, Chicago, IL, United States                                                                                                                                                                           | mengzhen.liu@abbvie.com            | <b>Clinical Groups</b> | <b>Women's Health and Reproduction Group</b> |
| Bridget Riley-Gillis       | Abbvie, Chicago, IL, United States                                                                                                                                                                           | bridget.rileygillis@abbvie.com     | <b>Clinical Groups</b> | <b>Women's Health and Reproduction Group</b> |
| Rion Pendergrass           | Genentech, San Francisco, CA, United States                                                                                                                                                                  | penders2@gene.com                  | <b>Clinical Groups</b> | <b>Women's Health and Reproduction Group</b> |
| Janet Kumar                | GlaxoSmithKline, Collegeville, PA, United States                                                                                                                                                             | janet.x.kumar@gsk.com              | <b>Clinical Groups</b> | <b>Women's Health and Reproduction Group</b> |
| Kirsi Auro                 | GlaxoSmithKline, Espoo, Finland                                                                                                                                                                              | kirsi.m.auro@gsk.com               | <b>Clinical Groups</b> | <b>Women's Health and Reproduction Group</b> |
| Iiris Hovatta              | University of Helsinki, Finland                                                                                                                                                                              | iiris.hovatta@helsinki.fi          | <b>Clinical Groups</b> | <b>Depression group</b>                      |
| Chia-Yen Chen              | Biogen, Cambridge, MA, United States                                                                                                                                                                         | chiayen.chen@biogen.com            | <b>Clinical Groups</b> | <b>Depression group</b>                      |
| Erkki Isometsä             | Hospital District of Helsinki and Uusimaa, Helsinki, Finland                                                                                                                                                 | erkki.isometsa@hus.fi              | <b>Clinical Groups</b> | <b>Depression group</b>                      |
| Hanna Ollila               | Institute for Molecular Medicine Finland (FIMM), HiLIFE, University of Helsinki, Helsinki, Finland                                                                                                           | hanna.m.ollila@helsinki.fi         | <b>Clinical Groups</b> | <b>Depression group</b>                      |
| Jaana Suvisaari            | Finnish Institute for Health and Welfare (THL), Helsinki, Finland                                                                                                                                            | jaana.suvisaari@thl.fi             | <b>Clinical Groups</b> | <b>Depression group</b>                      |
| Antti Mäkitie              | Department of Otorhinolaryngology - Head and Neck Surgery, University of Helsinki and Helsinki University Hospital, Helsinki, Finland                                                                        | antti.makitie@helsinki.fi          | <b>Clinical Groups</b> | <b>ENT (ear, nose and throat) Group</b>      |
| Argyro Bizaki-Vallaskangas | Pirkanmaa Hospital District, Tampere, Finland                                                                                                                                                                | argyro.bizaki-vallaskangas@tuni.fi | <b>Clinical Groups</b> | <b>ENT (ear, nose and throat) Group</b>      |
| Sanna Toppila-Salmi        | University of Eastern Finland and Kuopio University Hospital, Department of Otorhinolaryngology, Kuopio, Finland and Department of Allergy, Helsinki University Hospital and University of Helsinki, Finland | sanna.salmi@helsinki.fi            | <b>Clinical Groups</b> | <b>ENT (ear, nose and throat) Group</b>      |
| Tytti Willberg             | Hospital District of Southwest Finland, Turku, Finland                                                                                                                                                       | tytti.willberg@tyks.fi             | <b>Clinical Groups</b> | <b>ENT (ear, nose and throat) Group</b>      |
| Elmo Saarentaus            | Institute for Molecular Medicine Finland (FIMM), HiLIFE, University of Helsinki, Helsinki, Finland                                                                                                           | elmo.saarentaus@helsinki.fi        | <b>Clinical Groups</b> | <b>ENT (ear, nose and throat) Group</b>      |
| Antti Aarnisalo            | Hospital District of Helsinki and Uusimaa, Helsinki, Finland                                                                                                                                                 | antti.aarnisalo@hus.fi             | <b>Clinical Groups</b> | <b>ENT (ear, nose and throat) Group</b>      |
| Eveliina Salminen          | Hospital District of Helsinki and Uusimaa, Helsinki, Finland                                                                                                                                                 | eveliina.e.salminen@hus.fi         | <b>Clinical Groups</b> | <b>ENT (ear, nose and throat) Group</b>      |
| Elisa Rahikkala            | Northern Ostrobothnia Hospital District, Oulu, Finland                                                                                                                                                       | elisa.rahikkala@ppshp.fi           | <b>Clinical Groups</b> | <b>ENT (ear, nose and throat) Group</b>      |
| Johannes Kettunen          | Northern Ostrobothnia Hospital District, Oulu, Finland                                                                                                                                                       | johannes.kettunen@oulu.fi          | <b>Clinical Groups</b> | <b>ENT (ear, nose and throat) Group</b>      |
| Kristiina Aittomäki        | Department of Medical Genetics, Helsinki University Central Hospital, Helsinki, Finland                                                                                                                      | kristiina.aittomaki@helsinki.fi    | <b>Clinical Groups</b> | <b>POI (premature ovarian failure) Group</b> |



|                             |                                                                                                                                                                         |                                       |                                |                                |
|-----------------------------|-------------------------------------------------------------------------------------------------------------------------------------------------------------------------|---------------------------------------|--------------------------------|--------------------------------|
| Fredrik Åberg               | Transplantation and Liver Surgery Clinic, Helsinki University Hospital, Helsinki University, Helsinki, Finland                                                          | fredrik.berg@helsinki.fi              | Clinical Groups                | LiverScore Group               |
| Mitja Kurki                 | Institute for Molecular Medicine Finland (FIMM), HiLIFE, University of Helsinki, Helsinki, Finland; Broad Institute, Cambridge, MA, United States                       | mkurki@broadinstitute.org             | FinnGen Analysis working group | FinnGen Analysis working group |
| Samuli Ripatti              | Institute for Molecular Medicine Finland (FIMM), HiLIFE, University of Helsinki, Helsinki, Finland                                                                      | samuli.ripatti@helsinki.fi            | FinnGen Analysis working group | FinnGen Analysis working group |
| Mark Daly                   | Institute for Molecular Medicine, Finland (FIMM), HiLIFE, University of Helsinki, Helsinki, Finland; Broad Institute of MIT and Harvard; Massachusetts General Hospital | mark.daly@helsinki.fi                 | FinnGen Analysis working group | FinnGen Analysis working group |
| Juha Karjalainen            | Institute for Molecular Medicine Finland (FIMM), HiLIFE, University of Helsinki, Helsinki, Finland                                                                      | juha.karjalainen@helsinki.fi          | FinnGen Analysis working group | FinnGen Analysis working group |
| Aki Havulinna               | Institute for Molecular Medicine Finland (FIMM), HiLIFE, University of Helsinki, Helsinki, Finland; Finnish Institute for Health and Welfare (THL), Helsinki, Finland   | aki.havulinna@helsinki.fi             | FinnGen Analysis working group | FinnGen Analysis working group |
| Juha Mehtonen               | Institute for Molecular Medicine Finland (FIMM), HiLIFE, University of Helsinki, Helsinki, Finland                                                                      | juha.mehtonen@helsinki.fi             | FinnGen Analysis working group | FinnGen Analysis working group |
| Priit Palta                 | Institute for Molecular Medicine Finland (FIMM), HiLIFE, University of Helsinki, Helsinki, Finland                                                                      | priit.palta@helsinki.fi               | FinnGen Analysis working group | FinnGen Analysis working group |
| Shabbeer Hassan             | Institute for Molecular Medicine Finland (FIMM), HiLIFE, University of Helsinki, Helsinki, Finland                                                                      | shabbeer.hassan@helsinki.fi           | FinnGen Analysis working group | FinnGen Analysis working group |
| Pietro Della Briotta Parolo | Institute for Molecular Medicine Finland (FIMM), HiLIFE, University of Helsinki, Helsinki, Finland                                                                      | pietro.dellabriottaparolo@helsinki.fi | FinnGen Analysis working group | FinnGen Analysis working group |
| Wei Zhou                    | Broad Institute, Cambridge, MA, United States                                                                                                                           | wzhou@broadinstitute.org              | FinnGen Analysis working group | FinnGen Analysis working group |
| Mutaamba Maasha             | Broad Institute, Cambridge, MA, United States                                                                                                                           | mmaasha@broadinstitute.org            | FinnGen Analysis working group | FinnGen Analysis working group |
| Shabbeer Hassan             | Institute for Molecular Medicine Finland (FIMM), HiLIFE, University of Helsinki, Helsinki, Finland                                                                      | shabbeer.hassan@helsinki.fi           | FinnGen Analysis working group | FinnGen Analysis working group |
| Susanna Lemmelä             | Institute for Molecular Medicine Finland (FIMM), HiLIFE, University of Helsinki, Helsinki, Finland                                                                      | susanna.lemmela@helsinki.fi           | FinnGen Analysis working group | FinnGen Analysis working group |
| Manuel Rivas                | University of Stanford, Stanford, CA, United States                                                                                                                     | mrivas@stanford.edu                   | FinnGen Analysis working group | FinnGen Analysis working group |
| Aarno Palotie               | Institute for Molecular Medicine Finland (FIMM), HiLIFE, University of Helsinki, Helsinki, Finland                                                                      | aarno.palotie@helsinki.fi             | FinnGen Analysis working group | FinnGen Analysis working group |
| Aoxing Liu                  | Institute for Molecular Medicine Finland (FIMM), HiLIFE, University of Helsinki, Helsinki, Finland                                                                      | aoxing.liu@helsinki.fi                | FinnGen Analysis               | FinnGen Analysis working group |

|                        |                                                                                                    |                                |                                       |                                       |
|------------------------|----------------------------------------------------------------------------------------------------|--------------------------------|---------------------------------------|---------------------------------------|
|                        |                                                                                                    |                                | <b>working group</b>                  |                                       |
| Arto Lehisto           | Institute for Molecular Medicine Finland (FIMM), HiLIFE, University of Helsinki, Helsinki, Finland | arto.lehisto@helsinki.fi       | <b>FinnGen Analysis working group</b> | <b>FinnGen Analysis working group</b> |
| Andrea Ganna           | Institute for Molecular Medicine Finland (FIMM), HiLIFE, University of Helsinki, Helsinki, Finland | aganna@broadinstitute.org      | <b>FinnGen Analysis working group</b> | <b>FinnGen Analysis working group</b> |
| Vincent Llorens        | Institute for Molecular Medicine Finland (FIMM), HiLIFE, University of Helsinki, Helsinki, Finland | vincent.llorens@helsinki.fi    | <b>FinnGen Analysis working group</b> | <b>FinnGen Analysis working group</b> |
| Hannele Laivuori       | Institute for Molecular Medicine Finland (FIMM), HiLIFE, University of Helsinki, Helsinki, Finland | hannele.laivuori@helsinki.fi   | <b>FinnGen Analysis working group</b> | <b>FinnGen Analysis working group</b> |
| Taru Tukiainen         | Institute for Molecular Medicine Finland (FIMM), HiLIFE, University of Helsinki, Helsinki, Finland | taru.tukiainen@helsinki.fi     | <b>FinnGen Analysis working group</b> | <b>FinnGen Analysis working group</b> |
| Mary Pat Reeve         | Institute for Molecular Medicine Finland (FIMM), HiLIFE, University of Helsinki, Helsinki, Finland | mary.reeve@helsinki.fi         | <b>FinnGen Analysis working group</b> | <b>FinnGen Analysis working group</b> |
| Henrike Heyne          | Institute for Molecular Medicine Finland (FIMM), HiLIFE, University of Helsinki, Helsinki, Finland | hheyne@broadinstitute.org      | <b>FinnGen Analysis working group</b> | <b>FinnGen Analysis working group</b> |
| Nina Mars              | Institute for Molecular Medicine Finland (FIMM), HiLIFE, University of Helsinki, Helsinki, Finland | nina.mars@helsinki.fi          | <b>FinnGen Analysis working group</b> | <b>FinnGen Analysis working group</b> |
| Joel Rämö              | Institute for Molecular Medicine Finland (FIMM), HiLIFE, University of Helsinki, Helsinki, Finland | joel.ramo@helsinki.fi          | <b>FinnGen Analysis working group</b> | <b>FinnGen Analysis working group</b> |
| Elmo Saarentaus        | Institute for Molecular Medicine Finland (FIMM), HiLIFE, University of Helsinki, Helsinki, Finland | elmo.saarentaus@helsinki.fi    | <b>FinnGen Analysis working group</b> | <b>FinnGen Analysis working group</b> |
| Hanna Ollila           | Institute for Molecular Medicine Finland (FIMM), HiLIFE, University of Helsinki, Helsinki, Finland | hanna.m.ollila@helsinki.fi     | <b>FinnGen Analysis working group</b> | <b>FinnGen Analysis working group</b> |
| Rodos Rodosthenous     | Institute for Molecular Medicine Finland (FIMM), HiLIFE, University of Helsinki, Helsinki, Finland | rodos.rodosthenous@helsinki.fi | <b>FinnGen Analysis working group</b> | <b>FinnGen Analysis working group</b> |
| Satu Strausz           | Institute for Molecular Medicine Finland (FIMM), HiLIFE, University of Helsinki, Helsinki, Finland | satu.strausz@helsinki.fi       | <b>FinnGen Analysis working group</b> | <b>FinnGen Analysis working group</b> |
| Tuula Palotie          | University of Helsinki and Hospital District of Helsinki and Uusimaa, Helsinki, Finland            | tuula.palotie@helsinki.fi      | <b>FinnGen Analysis working group</b> | <b>FinnGen Analysis working group</b> |
| Kimmo Palin            | University of Helsinki, Helsinki, Finland                                                          | kimmo.palin@helsinki.fi        | <b>FinnGen Analysis working group</b> | <b>FinnGen Analysis working group</b> |
| Javier Garcia-Tabuenca | University of Tampere, Tampere, Finland                                                            | javier.graciatabuenca@tuni.fi  | <b>FinnGen Analysis working group</b> | <b>FinnGen Analysis working group</b> |
| Harri Siirtola         | University of Tampere, Tampere, Finland                                                            | harri.siirtola@tuni.fi         | <b>FinnGen Analysis</b>               | <b>FinnGen Analysis working group</b> |

|                   |                                                                                                                                                                                             |                               |                                       |                                       |
|-------------------|---------------------------------------------------------------------------------------------------------------------------------------------------------------------------------------------|-------------------------------|---------------------------------------|---------------------------------------|
|                   |                                                                                                                                                                                             |                               | <b>working group</b>                  |                                       |
| Tuomo Kiiskinen   | Institute for Molecular Medicine Finland (FIMM), HiLIFE, University of Helsinki, Helsinki, Finland                                                                                          | tuomo.kiiskinen@helsinki.fi   | <b>FinnGen Analysis working group</b> | <b>FinnGen Analysis working group</b> |
| Jiwoo Lee         | Institute for Molecular Medicine Finland (FIMM), HiLIFE, University of Helsinki, Helsinki, Finland; Broad Institute, Cambridge, MA, United States                                           | jiwoo.lee@helsinki.fi         | <b>FinnGen Analysis working group</b> | <b>FinnGen Analysis working group</b> |
| Kristin Tsuo      | Institute for Molecular Medicine Finland (FIMM), HiLIFE, University of Helsinki, Helsinki, Finland; Broad Institute, Cambridge, MA, United States                                           | kristintsuo@fas.harvard.edu   | <b>FinnGen Analysis working group</b> | <b>FinnGen Analysis working group</b> |
| Amanda Elliott    | Institute for Molecular Medicine Finland (FIMM), HiLIFE, University of Helsinki, Helsinki, Finland; Broad Institute, Cambridge, MA, USA and Massachusetts General Hospital, Boston, MA, USA | aelliott@broadinstitute.org   | <b>FinnGen Analysis working group</b> | <b>FinnGen Analysis working group</b> |
| Kati Kristiansson | THL Biobank / Finnish Institute for Health and Welfare (THL), Helsinki, Finland                                                                                                             | kati.kristiansson@thl.fi      | <b>FinnGen Analysis working group</b> | <b>FinnGen Analysis working group</b> |
| Mikko Arvas       | Finnish Red Cross Blood Service / Finnish Hematology Registry and Clinical Biobank, Helsinki, Finland                                                                                       | mikko.arvas@veripalvelu.fi    | <b>FinnGen Analysis working group</b> | <b>FinnGen Analysis working group</b> |
| Kati Hyvärinen    | Finnish Red Cross Blood Service, Helsinki, Finland                                                                                                                                          | kati.hyvarinen@veripalvelu.fi | <b>FinnGen Analysis working group</b> | <b>FinnGen Analysis working group</b> |
| Jarmo Ritari      | Finnish Red Cross Blood Service, Helsinki, Finland                                                                                                                                          | jarmo.ritari@veripalvelu.fi   | <b>FinnGen Analysis working group</b> | <b>FinnGen Analysis working group</b> |
| Olli Carpen       | Helsinki Biobank / Helsinki University and Hospital District of Helsinki and Uusimaa, Helsinki                                                                                              | olli.carpen@helsinki.fi       | <b>FinnGen Analysis working group</b> | <b>FinnGen Analysis working group</b> |
| Johannes Kettunen | Northern Finland Biobank Borealis / University of Oulu / Northern Ostrobothnia Hospital District, Oulu, Finland                                                                             | johannes.kettunen@oulu.fi     | <b>FinnGen Analysis working group</b> | <b>FinnGen Analysis working group</b> |
| Katri Pylkäs      | University of Oulu, Oulu, Finland                                                                                                                                                           | katri.pylkas@oulu.fi          | <b>FinnGen Analysis working group</b> | <b>FinnGen Analysis working group</b> |
| Eeva Sliz         | University of Oulu, Oulu, Finland                                                                                                                                                           | eeva.sliz@oulu.fi             | <b>FinnGen Analysis working group</b> | <b>FinnGen Analysis working group</b> |
| Minna Karjalainen | University of Oulu, Oulu, Finland                                                                                                                                                           | minna.k.karjalainen@oulu.fi   | <b>FinnGen Analysis working group</b> | <b>FinnGen Analysis working group</b> |
| Tuomo Mantere     | Northern Finland Biobank Borealis / University of Oulu / Northern Ostrobothnia Hospital District, Oulu, Finland                                                                             | tuomo.mantere@oulu.fi         | <b>FinnGen Analysis working group</b> | <b>FinnGen Analysis working group</b> |
| Eeva Kangasniemi  | Finnish Clinical Biobank Tampere / University of Tampere / Pirkanmaa Hospital District, Tampere, Finland                                                                                    | eeva.kangasniemi@pshp.fi      | <b>FinnGen Analysis working group</b> | <b>FinnGen Analysis working group</b> |
| Sami Heikkinen    | University of Eastern Finland, Kuopio, Finland                                                                                                                                              | sami.heikkinen@uef.fi         | <b>FinnGen Analysis</b>               | <b>FinnGen Analysis working group</b> |

|                   |                                                                                                                 |                               |                                       |                                       |
|-------------------|-----------------------------------------------------------------------------------------------------------------|-------------------------------|---------------------------------------|---------------------------------------|
|                   |                                                                                                                 |                               | <b>working group</b>                  |                                       |
| Arto Mannermaa    | Biobank of Eastern Finland / University of Eastern Finland / Northern Savo Hospital District, Kuopio, Finland   | arto.mannermaa@uef.fi         | <b>FinnGen Analysis working group</b> | <b>FinnGen Analysis working group</b> |
| Eija Laakkonen    | University of Jyväskylä, Jyväskylä, Finland                                                                     | eija.k.laakkonen@jyu.fi       | <b>FinnGen Analysis working group</b> | <b>FinnGen Analysis working group</b> |
| Nina Pitkänen     | Auria Biobank / University of Turku / Hospital District of Southwest Finland, Turku, Finland                    | Niina.Pitkanen@tyks.fi        | <b>FinnGen Analysis working group</b> | <b>FinnGen Analysis working group</b> |
| Samuel Lessard    | Translational Sciences, Sanofi R&D, Framingham, MA, USA                                                         | samuel.lessard@sanofi.com     | <b>FinnGen Analysis working group</b> | <b>FinnGen Analysis working group</b> |
| Clément Chatelain | Translational Sciences, Sanofi R&D, Framingham, MA, USA                                                         | clement.chatelain@sanofi.com  | <b>FinnGen Analysis working group</b> | <b>FinnGen Analysis working group</b> |
| Lila Kallio       | Auria Biobank / University of Turku / Hospital District of Southwest Finland, Turku, Finland                    | Lila.Kallio@tyks.fi           | <b>Biobank directors</b>              | <b>Biobank directors</b>              |
| Tiina Wahlfors    | THL Biobank / Finnish Institute for Health and Welfare (THL), Helsinki, Finland                                 | tiina.wahlfors@thl.fi         | <b>Biobank directors</b>              | <b>Biobank directors</b>              |
| Jukka Partanen    | Finnish Red Cross Blood Service / Finnish Hematology Registry and Clinical Biobank, Helsinki, Finland           | jukka.partanen@veripalvelu.fi | <b>Biobank directors</b>              | <b>Biobank directors</b>              |
| Eero Punkka       | Helsinki Biobank / Helsinki University and Hospital District of Helsinki and Uusimaa, Helsinki                  | eero.punkka@hus.fi            | <b>Biobank directors</b>              | <b>Biobank directors</b>              |
| Raisa Serpi       | Northern Finland Biobank Borealis / University of Oulu / Northern Ostrobothnia Hospital District, Oulu, Finland | rais.a.serpi@ppshp.fi         | <b>Biobank directors</b>              | <b>Biobank directors</b>              |
| Sanna Siltanen    | Finnish Clinical Biobank Tampere / University of Tampere / Pirkanmaa Hospital District, Tampere, Finland        | sanna.siltanen@pshp.fi        | <b>Biobank directors</b>              | <b>Biobank directors</b>              |
| Veli-Matti Kosma  | Biobank of Eastern Finland / University of Eastern Finland / Northern Savo Hospital District, Kuopio, Finland   | veli-matti.kosma@uef.fi       | <b>Biobank directors</b>              | <b>Biobank directors</b>              |
| Teijo Kuopio      | Central Finland Biobank / University of Jyväskylä / Central Finland Health Care District, Jyväskylä, Finland    | teijo.kuopio@ksshp.fi         | <b>Biobank directors</b>              | <b>Biobank directors</b>              |
| Anu Jalanko       | Institute for Molecular Medicine Finland (FIMM), HiLIFE, University of Helsinki, Helsinki, Finland              | anu.jalanko@helsinki.fi       | <b>FinnGen Teams</b>                  | <b>Administration</b>                 |
| Huei-Yi Shen      | Institute for Molecular Medicine Finland (FIMM), HiLIFE, University of Helsinki, Helsinki, Finland              | huei-yi.shen@helsinki.fi      | <b>FinnGen Teams</b>                  | <b>Administration</b>                 |
| Risto Kajanne     | Institute for Molecular Medicine Finland (FIMM), HiLIFE, University of Helsinki, Helsinki, Finland              | risto.kajanne@helsinki.fi     | <b>FinnGen Teams</b>                  | <b>Administration</b>                 |
| Mervi Aavikko     | Institute for Molecular Medicine Finland (FIMM), HiLIFE, University of Helsinki, Helsinki, Finland              | mervi.aavikko@helsinki.fi     | <b>FinnGen Teams</b>                  | <b>Administration</b>                 |
| Helen Cooper      | Institute for Molecular Medicine Finland (FIMM), HiLIFE, University of Helsinki, Helsinki, Finland              | helen.cooper@helsinki.fi      | <b>FinnGen Teams</b>                  | <b>Administration</b>                 |
| Denise Öller      | Institute for Molecular Medicine Finland (FIMM), HiLIFE, University of Helsinki, Helsinki, Finland              | denise.oller@helsinki.fi      | <b>FinnGen Teams</b>                  | <b>Administration</b>                 |
| Rasko Leinonen    | Institute for Molecular Medicine Finland (FIMM), HiLIFE, University of Helsinki, Helsinki, Finland; European    | rasko@ebi.ac.uk               | <b>FinnGen Teams</b>                  | <b>Administration</b>                 |

|                             |                                                                                                                                                                       |                                       |                      |                                      |
|-----------------------------|-----------------------------------------------------------------------------------------------------------------------------------------------------------------------|---------------------------------------|----------------------|--------------------------------------|
|                             | Molecular Biology Laboratory, European Bioinformatics Institute, Cambridge, UK                                                                                        |                                       |                      |                                      |
| Henna Palin                 | Finnish Clinical Biobank Tampere / University of Tampere / Pirkanmaa Hospital District, Tampere, Finland                                                              | henna.palin@pshp.fi                   | <b>FinnGen Teams</b> | <b>Administration</b>                |
| Malla-Maria Linna           | Helsinki Biobank / Helsinki University and Hospital District of Helsinki and Uusimaa, Helsinki                                                                        | malla-maria.linna@hus.fi              | <b>FinnGen Teams</b> | <b>Administration</b>                |
| Mitja Kurki                 | Institute for Molecular Medicine Finland (FIMM), HiLIFE, University of Helsinki, Helsinki, Finland; Broad Institute, Cambridge, MA, United States                     | mkurki@broadinstitute.org             | <b>FinnGen Teams</b> | <b>Analysis</b>                      |
| Juha Karjalainen            | Institute for Molecular Medicine Finland (FIMM), HiLIFE, University of Helsinki, Helsinki, Finland                                                                    | juha.karjalainen@helsinki.fi          | <b>FinnGen Teams</b> | <b>Analysis</b>                      |
| Pietro Della Briotta Parolo | Institute for Molecular Medicine Finland (FIMM), HiLIFE, University of Helsinki, Helsinki, Finland                                                                    | pietro.dellabriottaparolo@helsinki.fi | <b>FinnGen Teams</b> | <b>Analysis</b>                      |
| Arto Lehisto                | Institute for Molecular Medicine Finland (FIMM), HiLIFE, University of Helsinki, Helsinki, Finland                                                                    | arto.lehisto@helsinki.fi              | <b>FinnGen Teams</b> | <b>Analysis</b>                      |
| Juha Mehtonen               | Institute for Molecular Medicine Finland (FIMM), HiLIFE, University of Helsinki, Helsinki, Finland                                                                    | juha.mehtonen@helsinki.fi             | <b>FinnGen Teams</b> | <b>Analysis</b>                      |
| Wei Zhou                    | Broad Institute, Cambridge, MA, United States                                                                                                                         | wzhou@broadinstitute.org              | <b>FinnGen Teams</b> | <b>Analysis</b>                      |
| Masahiro Kanai              | Broad Institute, Cambridge, MA, United States                                                                                                                         | mkanai@broadinstitute.org             | <b>FinnGen Teams</b> | <b>Analysis</b>                      |
| Mutaamba Maasha             | Broad Institute, Cambridge, MA, United States                                                                                                                         | mmaasha@broadinstitute.org            | <b>FinnGen Teams</b> | <b>Analysis</b>                      |
| Zhili Zheng                 | Broad Institute, Cambridge, MA, United States                                                                                                                         | zhengzhi@broadinstitute.org           | <b>FinnGen Teams</b> | <b>Analysis</b>                      |
| Hannele Laivuori            | Institute for Molecular Medicine Finland (FIMM), HiLIFE, University of Helsinki, Helsinki, Finland                                                                    | hannele.laivuori@helsinki.fi          | <b>FinnGen Teams</b> | <b>Clinical Endpoint Development</b> |
| Aki Havulinna               | Institute for Molecular Medicine Finland (FIMM), HiLIFE, University of Helsinki, Helsinki, Finland; Finnish Institute for Health and Welfare (THL), Helsinki, Finland | aki.havulinna@helsinki.fi             | <b>FinnGen Teams</b> | <b>Clinical Endpoint Development</b> |
| Susanna Lemmelä             | Institute for Molecular Medicine Finland (FIMM), HiLIFE, University of Helsinki, Helsinki, Finland                                                                    | susanna.lemmela@helsinki.fi           | <b>FinnGen Teams</b> | <b>Clinical Endpoint Development</b> |
| Tuomo Kiiskinen             | Institute for Molecular Medicine Finland (FIMM), HiLIFE, University of Helsinki, Helsinki, Finland                                                                    | tuomo.kiiskinen@helsinki.fi           | <b>FinnGen Teams</b> | <b>Clinical Endpoint Development</b> |
| L. Elisa Lahtela            | Institute for Molecular Medicine Finland (FIMM), HiLIFE, University of Helsinki, Helsinki, Finland                                                                    | laura.lahtela@helsinki.fi             | <b>FinnGen Teams</b> | <b>Clinical Endpoint Development</b> |
| Mari Kaunisto               | Institute for Molecular Medicine Finland (FIMM), HiLIFE, University of Helsinki, Helsinki, Finland                                                                    | mari.kaunisto@helsinki.fi             | <b>FinnGen Teams</b> | <b>Communication</b>                 |
| Elina Kilpeläinen           | Institute for Molecular Medicine Finland (FIMM), HiLIFE, University of Helsinki, Helsinki, Finland                                                                    | elina.kilpelainen@helsinki.fi         | <b>FinnGen Teams</b> | <b>E-Science</b>                     |
| Timo P. Sipilä              | Institute for Molecular Medicine Finland (FIMM), HiLIFE, University of Helsinki, Helsinki, Finland                                                                    | timo.p.sipila@helsinki.fi             | <b>FinnGen Teams</b> | <b>E-Science</b>                     |
| Oluwaseun Alexander Dada    | Institute for Molecular Medicine Finland (FIMM), HiLIFE, University of Helsinki, Helsinki, Finland                                                                    | alexander.dada@helsinki.fi            | <b>FinnGen Teams</b> | <b>E-Science</b>                     |
| Awaisa Ghazal               | Institute for Molecular Medicine Finland (FIMM), HiLIFE, University of Helsinki, Helsinki, Finland                                                                    | awaisa.ghazal@helsinki.fi             | <b>FinnGen Teams</b> | <b>E-Science</b>                     |
| Anastasia Kytölä            | Institute for Molecular Medicine Finland (FIMM), HiLIFE, University of Helsinki, Helsinki, Finland                                                                    | anastasia.shcherban@helsinki.fi       | <b>FinnGen Teams</b> | <b>E-Science</b>                     |

|                    |                                                                                                    |                                |                      |                                       |
|--------------------|----------------------------------------------------------------------------------------------------|--------------------------------|----------------------|---------------------------------------|
| Rigbe Weldatsadik  | Institute for Molecular Medicine Finland (FIMM), HiLIFE, University of Helsinki, Helsinki, Finland | rigbe.weldatsadik@helsinki.fi  | <b>FinnGen Teams</b> | <b>E-Science</b>                      |
| Sanni Ruotsalainen | Institute for Molecular Medicine Finland (FIMM), HiLIFE, University of Helsinki, Helsinki, Finland | sanni.ruotsalainen@helsinki.fi | <b>FinnGen Teams</b> | <b>E-Science</b>                      |
| Kati Donner        | Institute for Molecular Medicine Finland (FIMM), HiLIFE, University of Helsinki, Helsinki, Finland | kati.donner@helsinki.fi        | <b>FinnGen Teams</b> | <b>Genotyping</b>                     |
| Timo P. Sipilä     | Institute for Molecular Medicine Finland (FIMM), HiLIFE, University of Helsinki, Helsinki, Finland | timo.p.sipila@helsinki.fi      | <b>FinnGen Teams</b> | <b>Genotyping</b>                     |
| Anu Loukola        | Helsinki Biobank / Helsinki University and Hospital District of Helsinki and Uusimaa, Helsinki     | anu.loukola@hus.fi             | <b>FinnGen Teams</b> | <b>Sample Collection Coordination</b> |
| Päivi Laiho        | THL Biobank / Finnish Institute for Health and Welfare (THL), Helsinki, Finland                    | paivi.laiho@thl.fi             | <b>FinnGen Teams</b> | <b>Sample Logistics</b>               |
| Tuuli Sistonen     | THL Biobank / Finnish Institute for Health and Welfare (THL), Helsinki, Finland                    | tuuli.sistonen@thl.fi          | <b>FinnGen Teams</b> | <b>Sample Logistics</b>               |
| Essi Kaiharju      | THL Biobank / Finnish Institute for Health and Welfare (THL), Helsinki, Finland                    | essi.kaiharju@thl.fi           | <b>FinnGen Teams</b> | <b>Sample Logistics</b>               |
| Markku Laukkanen   | THL Biobank / Finnish Institute for Health and Welfare (THL), Helsinki, Finland                    | markku.laukkanen@thl.fi        | <b>FinnGen Teams</b> | <b>Sample Logistics</b>               |
| Elina Järvensivu   | THL Biobank / Finnish Institute for Health and Welfare (THL), Helsinki, Finland                    | elina.jarvensivu@thl.fi        | <b>FinnGen Teams</b> | <b>Sample Logistics</b>               |
| Sini Lähteenmäki   | THL Biobank / Finnish Institute for Health and Welfare (THL), Helsinki, Finland                    | sini.lahteenmaki@thl.fi        | <b>FinnGen Teams</b> | <b>Sample Logistics</b>               |
| Lotta Männikkö     | THL Biobank / Finnish Institute for Health and Welfare (THL), Helsinki, Finland                    | lotta.mannikko@thl.fi          | <b>FinnGen Teams</b> | <b>Sample Logistics</b>               |
| Regis Wong         | THL Biobank / Finnish Institute for Health and Welfare (THL), Helsinki, Finland                    | regis.wong@thl.fi              | <b>FinnGen Teams</b> | <b>Sample Logistics</b>               |
| Auli Toivola       | THL Biobank / Finnish Institute for Health and Welfare (THL), Helsinki, Finland                    | auli.toivola@thl.fi            | <b>FinnGen Teams</b> | <b>Sample Logistics</b>               |
| Minna Brunfeldt    | THL Biobank / Finnish Institute for Health and Welfare (THL), Helsinki, Finland                    | minna.brunfeldt@thl.fi         | <b>FinnGen Teams</b> | <b>Registry Data Operations</b>       |
| Hannele Mattsson   | THL Biobank / Finnish Institute for Health and Welfare (THL), Helsinki, Finland                    | hannele.mattsson@thl.fi        | <b>FinnGen Teams</b> | <b>Registry Data Operations</b>       |
| Kati Kristiansson  | THL Biobank / Finnish Institute for Health and Welfare (THL), Helsinki, Finland                    | kati.kristiansson@thl.fi       | <b>FinnGen Teams</b> | <b>Registry Data Operations</b>       |
| Susanna Lemmelä    | Institute for Molecular Medicine Finland (FIMM), HiLIFE, University of Helsinki, Helsinki, Finland | susanna.lemmela@helsinki.fi    | <b>FinnGen Teams</b> | <b>Registry Data Operations</b>       |
| Sami Koskelainen   | THL Biobank / Finnish Institute for Health and Welfare (THL), Helsinki, Finland                    | sami.koskelainen@thl.fi        | <b>FinnGen Teams</b> | <b>Registry Data Operations</b>       |
| Tero Hiekkalinna   | THL Biobank / Finnish Institute for Health and Welfare (THL), Helsinki, Finland                    | tero.hiekkalinna@helsinki.fi   | <b>FinnGen Teams</b> | <b>Registry Data Operations</b>       |
| Teemu Paajanen     | THL Biobank / Finnish Institute for Health and Welfare (THL), Helsinki, Finland                    | teemu.paajanen@thl.fi          | <b>FinnGen Teams</b> | <b>Registry Data Operations</b>       |
| Priit Palta        | Institute for Molecular Medicine Finland (FIMM), HiLIFE, University of Helsinki, Helsinki, Finland | priit.palta@helsinki.fi        | <b>FinnGen Teams</b> | <b>Sequencing Informatics</b>         |
| Shuang Luo         | Institute for Molecular Medicine Finland (FIMM), HiLIFE, University of Helsinki, Helsinki, Finland | shuang.luo@helsinki.fi         | <b>FinnGen Teams</b> | <b>Sequencing Informatics</b>         |

|                                |                                                                                                    |                               |                      |                                            |
|--------------------------------|----------------------------------------------------------------------------------------------------|-------------------------------|----------------------|--------------------------------------------|
| Tarja Laitinen                 | Pirkanmaa Hospital District, Tampere, Finland                                                      | tarja.laitinen@pshp.fi        | <b>FinnGen Teams</b> | <b>Trajectory</b>                          |
| Mary Pat Reeve                 | Institute for Molecular Medicine Finland (FIMM), HiLIFE, University of Helsinki, Helsinki, Finland | mary.reeve@helsinki.fi        | <b>FinnGen Teams</b> | <b>Trajectory</b>                          |
| Shanmukha Sampath Padmanabhuni | Institute for Molecular Medicine Finland (FIMM), HiLIFE, University of Helsinki, Helsinki, Finland | sam.padmanabhuni@helsinki.fi  | <b>FinnGen Teams</b> | <b>Trajectory</b>                          |
| Marianna Niemi                 | University of Tampere, Tampere, Finland                                                            | marianna.niemi@tuni.fi        | <b>FinnGen Teams</b> | <b>Trajectory</b>                          |
| Harri Siirtola                 | University of Tampere, Tampere, Finland                                                            | harri.siirtola@tuni.fi        | <b>FinnGen Teams</b> | <b>Trajectory</b>                          |
| Javier Gracia-Tabuenca         | University of Tampere, Tampere, Finland                                                            | javier.graciatabuenca@tuni.fi | <b>FinnGen Teams</b> | <b>Trajectory</b>                          |
| Mika Helminen                  | University of Tampere, Tampere, Finland                                                            | mika.helminen@tuni.fi         | <b>FinnGen Teams</b> | <b>Trajectory</b>                          |
| Tiina Luukkaala                | University of Tampere, Tampere, Finland                                                            | tiina.luukkaala@tuni.fi       | <b>FinnGen Teams</b> | <b>Trajectory</b>                          |
| Iida Vähätalo                  | University of Tampere, Tampere, Finland                                                            | iida.vahatalo@epshp.fi        | <b>FinnGen Teams</b> | <b>Trajectory</b>                          |
| Jyrki Tammerluoto              | Institute for Molecular Medicine Finland (FIMM), HiLIFE, University of Helsinki, Helsinki, Finland | jyrki.tammerluoto@helsinki.fi | <b>FinnGen Teams</b> | <b>Data protection officer</b>             |
| Marco Hautalahti               | Finnish Biobank Cooperative - FINBB                                                                | marco.hautalahti@finbb.fi     | <b>FinnGen Teams</b> | <b>FINBB - Finnish biobank cooperative</b> |
| Johanna Mäkelä                 | Finnish Biobank Cooperative - FINBB                                                                | johanna.makela@finbb.fi       | <b>FinnGen Teams</b> | <b>FINBB - Finnish biobank cooperative</b> |
| Sarah Smith                    | Finnish Biobank Cooperative - FINBB                                                                | sarah.smith@finbb.fi          | <b>FinnGen Teams</b> | <b>FINBB - Finnish biobank cooperative</b> |
| Tom Southerington              | Finnish Biobank Cooperative - FINBB                                                                | tom.southerington@finbb.fi    | <b>FinnGen Teams</b> | <b>FINBB - Finnish biobank cooperative</b> |
| Petri Lehto                    | Finnish Biobank Cooperative - FINBB                                                                | petri.lehto@finbb.fi          | <b>FinnGen Teams</b> | <b>FINBB - Finnish biobank cooperative</b> |

### **Estonian Biobank Research Team**

| <b>Full Name</b> | <b>Affiliation</b>                                                 |
|------------------|--------------------------------------------------------------------|
| Andres Metspalu  | Estonian Genome Centre, Institute of Genomics, University of Tartu |
| Lili Milani      | Estonian Genome Centre, Institute of Genomics, University of Tartu |
| Reedik Mägi      | Estonian Genome Centre, Institute of Genomics, University of Tartu |
| Mari Nelis       | Estonian Genome Centre, Institute of Genomics, University of Tartu |
| Georgi Hudjashov | Estonian Genome Centre, Institute of Genomics, University of Tartu |
